1 **Comparative analysis based on transcriptomics and metabolomics data reveal differences**  
2 **between emmer and durum wheat in response to nitrogen starvation**

3  
4 Romina Beleggia<sup>1</sup>, Nooshin Omranian<sup>2,3</sup>, Yan Holtz<sup>4</sup>, Tania Gioia<sup>5</sup>, Fabio Fiorani<sup>6</sup>, Franca M. Nigro<sup>1</sup>,  
5 Nicola Pecchioni<sup>1</sup>, Pasquale De Vita<sup>1</sup>, Ulrich Schurr<sup>6</sup>, Jaques David<sup>4</sup>, Zoran Nikoloski<sup>2,3,7</sup>, Roberto  
6 Papa<sup>\*1,8</sup>

7  
8 <sup>1</sup> Council for Agricultural Research and Economics (CREA), Research Centre for Cereal and  
9 Industrial Crops (CREA-CI), S.S. 673, Km 25+200, 71122 Foggia, Italy

10 <sup>2</sup> Systems Biology and Mathematical Modeling Group, Max Planck Institute of Molecular Plant  
11 Physiology, Am Muhleberg 1, Potsdam, Germany

12 <sup>3</sup> Bioinformatics, Institute of Biochemistry and Biology, University of Potsdam, 14476 Potsdam,  
13 Germany

14 <sup>4</sup> Montpellier SupAgro, UMR Amelioration Genetique et Adaptation des Plantes, 2 place Viala,  
15 34060 Montpellier, France

16 <sup>5</sup> Scuola di Scienze Agrarie, Forestali, Alimentari e Ambientali, Università degli Studi della  
17 Basilicata, Via dell'Ateneo Lucano 10, 85100 Potenza, Italy

18 <sup>6</sup> Institute of Biosciences and Geosciences (IBG-2): Plant Sciences, Forschungszentrum Julich  
19 GmbH, 52425 Julich, Germany

20 <sup>7</sup> Center for Plant Systems Biology and Biotechnology, Plovdiv, Bulgaria

21 <sup>8</sup> Dipartimento di Scienze Agrarie, Alimentari e Ambientali, Università Politecnica delle Marche, via  
22 Breccie Bianche, 60131, Ancona, Italy

23

24 \*Correspondence: Roberto Papa ([r.papa@univpm.it](mailto:r.papa@univpm.it)); Tel.: +39-071-2204984/4280

25

26 Running Head: Nitrogen starvation in emmer and durum wheat

27 Key words: plant nutrition, *Triticum turgidum*, transcriptomics, metabolomics, stress, GABA,  
28 Glutamate

## 29 **Summary**

30 Mounting evidence indicates the key role of Nitrogen (N) on diverse processes in plant, including not  
31 only yield but also development and defense. Using a combined transcriptomics and metabolomics  
32 approach, we studied the response of seedlings to N starvation of two different tetraploid wheat  
33 genotypes from the two main domesticated subspecies, emmer (*Triticum turgidum* ssp. *dicoccum*)  
34 and durum wheat (*Triticum turgidum* ssp. *durum*). We found that durum wheat exhibits broader and  
35 stronger response in comparison to emmer as evidenced by the analysis of the differential expression  
36 pattern of both genes and metabolites and gene enrichment analysis. Emmer and durum wheat showed  
37 major differences in the responses to N starvation for transcription factor families. While emmer  
38 showed differential reduction in the levels of primary metabolites to N starvation, durum wheat  
39 exhibited increased levels of most metabolites, including GABA as an indicator of metabolic  
40 imbalance. The correlation-based networks including the differentially expressed genes and  
41 metabolites revealed tighter regulation of metabolism in durum wheat in comparison to emmer, as  
42 evidenced by the larger number of significant correlations. We also found that glutamate and GABA  
43 had highest values of centrality in the metabolic correlation network, suggesting their critical role in  
44 the genotype-specific response to N starvation of emmer and durum wheat, respectively. Moreover,  
45 this finding indicates that there might be contrasting strategies associated to GABA and Glutamate  
46 signaling modulating shoot vs root growth in the two different wheat subspecies.

## 47 **Introduction**

48 Availability and uptake of nitrogen (N) is considered a major driver of growth (Lea and Azevedo,  
49 2006). Indeed, N is an essential nutrient for all organisms, including plants, and is required for the  
50 biosynthesis of macromolecules, such as proteins, nucleic acids, and chlorophyll, and for the synthesis  
51 of many secondary metabolites with different roles in adaptation and signaling (Miller *et al.*, 2007).  
52 As a result, N deficiency (limited availability) and starvation (complete absence) dramatically affects  
53 plant growth and metabolism (Obata and Fernie, 2012).

54 However, only 30–50% of supplied N is taken up by crops (Raun and Johnson, 1999), and the  
55 remainder is lost by denitrification or leaching into terrestrial ecosystems, causing eutrophication and  
56 contamination of drinking water (Cassman *et al.*, 2003). Therefore, plant breeding efforts should be  
57 combined with improvement of crop management towards a more efficient use of N also to limit the  
58 use of fossil energy and environmental pollution (Ayadi *et al.*, 2014; Ruisi *et al.*, 2015). Towards this  
59 key objective, it is necessary to understand how plants react and cope with low N availability and  
60 identify the molecular basis of the natural genetic variation for adaptation to low N conditions.

61 Understanding the molecular mechanisms underlying the variation in traits responsible for the  
62 phenotypic plasticity in crop and wild species is a key step in addressing the challenges of modern  
63 agriculture, such as resilience to climate changes (Godfray *et al.*, 2010). In particular, understanding  
64 the genetic variation in N metabolism in major crop species, such as wheat, is expected to provide  
65 novel strategies for crop improvement (Kant *et al.*, 2011; Xu *et al.*, 2012; Hawkesford, 2017).

66 In an increasing number of model and crop species, transcriptome studies have highlighted the  
67 complexity of the regulatory mechanisms involved in the control of leaf or root gene expression under  
68 both N-limiting and non-limiting conditions (Krapp *et al.*, 2011; Humbert *et al.*, 2013; Simons *et al.*,  
69 2014; Curci *et al.*, 2017). In addition, studies about the response of several cereal (e.g. rice, barley,  
70 sorghum, and wheat) to N starvation have highlighted differentially expressed genes (DEGs) involved  
71 in the response (Curci *et al.*, 2017; Zuluaga *et al.*, 2017; Yang *et al.*, 2015, Gelli *et al.*, 2014; Guo *et al.*,  
72 2014). For instance, Gelli *et al.* (2014) compared transcriptomic levels in four tolerant and three  
73 sensitive sorghum genotypes to low N condition. Furthermore, Chen *et al.* (2011) and Hao *et al.*  
74 (2011) compared gene expression changes in response to N stress in two maize and soybean  
75 genotypes with contrasting low N tolerance.

76 Several works reported the combination of different 'omics' approaches in the evaluation of different  
77 crops responses to N starvation (Scheible *et al.*, 2004; Amieur *et al.*, 2012; Bielecka *et al.*, 2015;  
78 Vicente *et al.*, 2016; Yu *et al.*, 2017). Nevertheless, a limitation in these studies was the focus on a  
79 single genotype.

80 The analysis of gene expression can be complemented and expanded by using data on metabolite  
81 levels and their joint investigation with the help of network analysis approaches. The latter approaches  
82 have been useful in highlighting the role of metabolites in particular processes, but also for  
83 understanding the structure and regulation of the underlying metabolic and gene regulatory processes  
84 (Hirai *et al.*, 2005; Caldana *et al.*, 2011; Toubiana *et al.*, 2012, 2016; Beleggia *et al.*, 2016).  
85 The aim of this study was to investigate and compare the transcriptomic and metabolomics responses  
86 of two genotypes of tetraploid wheats (one emmer landrace and one elite durum wheat cultivar) to N  
87 starvation at the vegetative stage (seedling growth) that showed phenotypic responses to differences  
88 in N availability. Tetraploid wheats, (*Triticum turgidum* L.  $2n=4x=28$ ; AABB genome), alongside  
89 with einkorn and barley, were domesticated in the Fertile Crescent, and durum wheat derived from  
90 domesticated emmer (*Triticum turgidum* ssp. *dicoccum*) through a rather long human-driven selection  
91 process, including distinct and sequential domestication bottlenecks and continuous gene flow from  
92 wild emmer (*Triticum turgidum* ssp. *dicoccoides*) (Nesbitt and Samuel, 1998; Tanno and Willcox,  
93 2006; Luo *et al.*, 2007; Nevo, 2014). Here we obtained transcriptomics and metabolomics data from  
94 one emmer and one durum wheat genotype—the parents of a RIL population developed at CREA-CI  
95 Foggia (Russo *et al.*, 2014). Our integrative analyses facilitated an in-depth molecular  
96 characterization and the comparison of tetraploid wheats responses to N starvation.

## 97 **Results**

### 98 **Morphological and physiological differences under the two N conditions**

99 First, we investigated the effect of N-starvation on plant growth by the evaluation of 13 complex  
100 traits, namely 12 morphological traits, including: Total leaf number (TLN); Total leaf area (TLA);  
101 Shoot fresh weight (SFW); Primary visible root length (PRL); Lateral visible root length (LRL); Total  
102 visible root length (TRL); Visible root system depth (RSD); Visible root system width (RSW); Root  
103 dry weight (RDW); specific root length (SRL); Total visible root length/total leaf area ratio  
104 (TRL/TLA); Lateral visible root length/ Primary visible root length ratio (LRL/PRL), as well as one  
105 physiological trait, Leaf chlorophyll content (SPAD) in emmer (Molise Sel. Colli) and durum wheat  
106 (Simeto). Table 1 shows the significant changes according to a two-way ANOVA due to genotype  
107 (G), N treatment (N) and their interaction (GxN). The traits TLA and SFW showed significant  
108 differences due to G (higher values in durum wheat) and N effect (higher values under optimal N  
109 condition). There were three measured traits, namely TLN, RDW and TRL/TLA which were  
110 significantly affected by N starvation. Finally, for SRL and SPAD, a significant effect due to the GxN  
111 interaction was observed. For instance, emmer at optimal N exhibited the largest value of SRL in  
112 comparison to emmer at N starvation and durum wheat in both N conditions. The opposite held for  
113 SPAD, for which durum wheat showed the highest value at optimal N compared to durum wheat at -  
114 N and for both treatments of emmer.

115

### 116 **Transcriptomic differences between the two N conditions**

117 A global transcriptome analysis for the comparison of the two analyzed tetraploid wheat genotypes  
118 was performed using RNA-Seq Illumina technology resulting in 9.9 to 19.5 million reads per  
119 genotype (Table S1). These numbers were reduced after additional processing steps (see Methods)  
120 by 4.3 to 7.5%, depending on the sample. The cleaned reads were mapped on the bread wheat  
121 reference covering, on average, 70% of all reads in the analyzed genotypes (Table S1).

122 We used the mapped reads to assess the DEGs in each genotype between the two N conditions, i.e.  
123 N starvation and optimal N condition. The total number of genes expressed in emmer and durum  
124 wheat were 27,792 and 28,812, respectively. The number of significant DEGs for emmer was 1,788,  
125 while in durum wheat it was 3,129. The number of DEGs specific to durum wheat was ~3.2-fold  
126 larger than in emmer, and the number of DEGs common to the two genotypes was 1,095 (Figure 1A).  
127 In addition, the number of the up-regulated DEGs specific to durum wheat was 2.5-fold larger than  
128 those specific to emmer, while the number of down-regulated DEGs specific to durum wheat was  
129 3.5-fold larger than those specific to emmer (Figure 1B). Therefore, we found a stronger  
130 transcriptional response in durum wheat to the change in N availability in comparison to emmer.

## 131 **Functions of DEGs in emmer and durum wheat between the two N conditions**

132 The functional annotation of DEGs either common or specific to one of the genotypes, were reported  
133 in Table S2. Several DEGs were directly involved in N metabolism and transport. The key DEGs  
134 involved in nitrate assimilation, i.e. the gene coding for asparagine synthetase and aspartate  
135 aminotransferase, were up-regulated in both genotypes. In durum wheat, the gene coding for nitrate  
136 reductase was up-regulated, while the genes orthologous to *Arabidopsis* glutamine synthetase and  
137 glutamate dehydrogenase family were down-regulated in response to N-starvation (Table S2). A  
138 similar result was reported by Curci *et al.* (2017) for the response of durum wheat leaves to N chronic  
139 starvation during grain filling. One nitrate transporter and two ammonium transporters were found  
140 among the DEGs in emmer (Table S2). Interestingly, other DEGs associated with the translocation  
141 of other nutrient (potassium (8 genes), phosphate (1- [PhO1]), sulfate (1), zinc (1), calcium (8), copper  
142 (2), magnesium (3) and ABC transporter (6)) also changed under N starvation (Table S2).

143 A general alteration was observed for genes participating in carbon metabolism, especially for those  
144 involved in glycolysis, tricarboxylic acid cycle (TCA), photosynthesis and photorespiration,  
145 particularly in durum wheat (Table S2). Notably, gene coding for Phosphoglycerate kinase (PGK),  
146 Pyruvate kinase (PK), Glyceraldehyde 3-phosphate dehydrogenase (GAPDH), and Fructose  
147 bisphosphate aldolase were up-regulated and specific to durum wheat, while Pyruvate dehydrogenase  
148 E1-component subunit alpha (PDHA), Pyrophosphate--fructose 6-phosphate 1-phosphotransferase  
149 subunit alpha (PFP-ALPHA), and ATP-dependent 6-phosphofructokinase (PFK1) were up-regulated  
150 and specific to emmer. Concerning the Pentose phosphate pathway, one DEG encoding for glucose-  
151 6-phosphate dehydrogenase (G6PD) was up-regulated in both genotypes, while two orthologs to  
152 ribose-5-phosphate-isomerase (Rpi) were up-regulated only in durum wheat. Notably, orthologues to  
153 RuBisCO (5 DEGs) and ferredoxin (3 DEGs) were up regulated only in durum wheat.

154 Transcription factors from the ARFs (5 DEGs) and NF-Y (3 DEGs) families were found to be down-  
155 regulated in both genotypes, while the MYB family (1 DEGs) was up-regulated in durum wheat and  
156 PTACs (5 DEGs) families were up-regulated in both genotypes (Table S2). In addition, 35 protein  
157 kinases (PKs) were identified as DEGs, of which 13 were common to the two genotypes, while six  
158 and 16 were found as DEGs specific to emmer and durum wheat, respectively. Generally, N starvation  
159 causes several stress responses. About two thirds of DEGs common or specific to each genotype were  
160 up-regulated, and among them there were several antioxidant enzymes encoding genes, such as:  
161 superoxide dismutase (SOD), catalase (CAT), glutathione peroxidase (GPX), peroxiredoxin (Prx),  
162 and lipoxygenases (LOXs), as well as enzymes of the ascorbate-glutathione cycle, such as:  
163 glutathione reductase (GR) or those involved in the biosynthesis of secondary metabolites (Table S2).

164

## 165 **GO enrichment analysis of DEGs**

166 To investigate the transcriptomic changes in leaves of emmer and durum wheat under the two N  
167 conditions, we assessed the GO enrichment in the set of DEGs (see Methods).

168 The GO terms identified were categorized into 21 and 23 categories for emmer and durum wheat,  
169 respectively (Figure 2, Table S3). In both genotypes, the highest number of DEGs up-regulated were  
170 included in the categories ‘cellular process’, ‘metabolic process’, ‘binding’ and ‘catalytic’ while those  
171 that were differentially down-regulated were principally grouped into ‘binding’ and ‘catalytic’  
172 categories. Differences between the two genotypes were observed with respect to the molecular  
173 function category ‘transcription regulator’ which was enriched in both the down- and up-regulated  
174 DEGs in emmer and durum wheat, respectively, and in the GO terms associated with biological  
175 process categories ‘regulation of biological process’ and ‘reproductive process’, which were only  
176 enriched in durum wheat for up-regulated DEGs.

177 Extended list of over represented GO terms with the p-value of at most  $10^{-5}$  for emmer and durum  
178 wheat is reported in Table S4. Notably, all GO terms of the categories ‘cellular process’, ‘metabolic  
179 process’, ‘binding’ and ‘catalytic’ (e.g. those involving the nitrogen) which were enriched in emmer  
180 were also found in durum wheat. Durum wheat showed also specific over-represented GO terms in  
181 several categories; for instance, these included the cellular amino acid, oxoacid or organic acid  
182 metabolic processes, or the metabolic/biosynthetic process of isopentenyl diphosphate (Table S4). In  
183 addition, regarding the categories ‘binding’ and ‘catalytic activity’, durum wheat showed different  
184 over-represented GO terms among the DEGs differentially up- and down-regulated. For example,  
185 GO terms of oxidoreductase, ligase, hydrolase (on glycosyl bond or O-glycosyl compounds), lyase  
186 and transferase activity were not enriched in the down-regulated DEGs, while GO terms of kinase,  
187 protein kinase, protein serine/threonine kinase and phosphotransferase activity were not enriched on  
188 the up-regulated DEGs (Table S4).

189

## 190 **Metabolic differences between the two N conditions**

191 A total of 46 metabolites were identified and quantified using GC-MS (see Methods). These included  
192 41 polar and five non-polar compounds, divided into the following compound classes: amino acids,  
193 organic acids, sugars and sugar alcohols, fatty acids, polycosanols and phytosterols. The data were  
194 analyzed using two-way ANOVA and significant differences ( $P \leq 0.05$ ) for 23 metabolites including  
195 the TCA cycle intermediates, some sugars, shikimic and quinic acids, several amino acids and GABA  
196 were reported (Table S5). A higher content of metabolites was found in emmer under optimal N  
197 condition in comparison to durum wheat (see Figure 3 for illustrative comparison). For all  
198 metabolites, a strong significant effect due to the interaction of the genotype and N treatment (GxN)



199 was observed. Five metabolites (glutamic acid, aspartic acid, citric acid, saccharic acid and maltitol)  
200 showed also significant differences due to the effect of genotype (G) and treatment (N). Tryptophan  
201 showed only the genotype effect while aconitic and shikimic acids showed significant differences due  
202 to G apart from the GxN interaction.

203

#### 204 **Network analysis of combined data sets**

205 In general, the correlation structure among the combined data sets (transcripts and metabolites) of  
206 each genotype can be represented by a network, where a node denotes a transcript, or a metabolite  
207 and an edge stand for the presence of significant Pearson correlation between the data associated to  
208 the nodes. Overall, durum wheat showed 2.8-fold more significant correlations in comparison to  
209 emmer (Table 2). The intersection of the networks from the two genotypes included ~397,000 edges,  
210 of which 99.3% did not demonstrate significant differences between the two networks (using Fisher's  
211 z-transformation, see Methods). The latter set of edges (with no significant differences between the  
212 networks obtained for each genotype; by applying Fisher's z transformation) is said to comprise the  
213 common network between the two genotypes that represents the 31.5% and 11.2% of the total  
214 correlations in the networks of emmer and durum wheat, respectively.

215 Because we are interested in understanding if the differences in correlation could reflect the  
216 differences in regulation of transcripts and metabolites, we considered only the significant  
217 correlations between DEGs and significantly altered metabolites under the two N conditions; the  
218 number of such correlations in durum wheat was 2.3-fold larger than in emmer. Focusing the attention  
219 only on those metabolites that showed differential behavior between the two N conditions, as reported  
220 above, we observed that for emmer GABA is involved in the smallest number of edges (12), while  
221 maltitol participates in the largest number of edges (1,667). In durum wheat we find almost  
222 contrasting situation, isomaltose was involved in the smallest number of edges (28), while GABA  
223 exhibited the largest number of edges (2,954) (Table S6).

224 The effect of the observed differences between the correlation structures (i.e. networks) obtained for  
225 both genotypes can be investigated for each node and can be summarized by its centrality in the  
226 network. In this context, we selected those nodes showing the centrality measures (i.e., degree and  
227 betweenness) greater than the corresponding mean values in each genotypic-specific network.  
228 Considering the nodes of the two genotype-specific networks, those with a central role included 260  
229 and 479 genes in emmer and durum wheat, respectively (Table 2). In durum wheat also the  
230 metabolites: myo-inositol, quinic acid and valine showed high values for both centrality measures.  
231 To refine the network, we next included only DEGs with high values of centrality and only  
232 metabolites that were significantly contrasted between the two N conditions. In general, the total



233 number of edges decreased of about 79% and 85% for emmer and durum wheat, respectively (Table  
234 S6). The total number of edges between central DEGs and differentially behaved metabolites in  
235 durum wheat is higher than those in emmer by 3.6-fold for alanine and 479-fold for GABA. In  
236 contrast, in emmer, the number of edges between central DEGs and significantly contrasted  
237 metabolites: glutamic acid, isocitric acid, isomaltose, saccharic acid, serine, succinic acid, and  
238 threonine, were higher than those in durum wheat. Noteworthy, with aspartic acid, citric acid, fumaric  
239 acid and maltitol the number of edges was the same in both genotype-specific networks.

240

### 241 **Function of DEGs having a central role in the networks**

242 To evaluate the common or specific responses to N starvation in the two genotypes, we looked for  
243 the annotated functions of the DEGs shared between the two genotype-specific networks with a  
244 central role in at least one of the two networks (Table S7). Several DEGs related to photosynthesis  
245 were expressed in both genotypes but in some cases, they showed a central role only in emmer-  
246 specific network (e.g. Chlorophyll synthase (CHLG)) while, in contrast Carboxyl-terminal-  
247 processing peptidase 3 (CTPA3), Cytochrome c biogenesis protein (CCS1), and magnesium-chelatase  
248 subunit ChlD (ChlD) were found to have a central role in the durum wheat-specific network. In the  
249 network specific to emmer the most central nodes coded for Pyruvate phosphate dikinase 1 (PPDK)  
250 and Pyruvate dehydrogenase E1 component subunit alpha-3 (PDH-E1 ALPHA) which were down-  
251 and up-regulated, respectively.

252 In durum wheat-specific network, DEGs related to proteolysis as well as the synthesis of the cofactor  
253 FMN, that were up-regulated, had a central role in the network, and at the same time, Allantoinase  
254 (ALN), a key enzyme for biogenesis and degradation of allantoin and its degradation derivatives,  
255 essential in the assimilation, metabolism, transport, and storage of nitrogen in plants, was among the  
256 central nodes.

257 In both genotype-specific networks, different DEGs involved in the chloroplast development showed  
258 central roles (Table S7). Among the central DEGs, there were several genes related to detoxification  
259 and plant stress responses caused by N starvation. Only one DEG (Traes\_2BL\_CCD296233, down-  
260 regulated) encoding for the Stress Enhanced Protein 2 [SEP2], showed a central role in both genotype-  
261 specific networks (Table S7).

262 To highlight the differences between emmer and durum wheat, we also considered the putative  
263 annotation of the central DEGs in each genotype-specific network (see Table S8). In emmer, several  
264 genes involved in C metabolism or related to stress conditions responses were up-regulated; at the  
265 same time a DEG related to carbonic anhydrase (EC 4.2.1.1), involved in N metabolism, was down-  
266 regulated. In contrast, in durum wheat, several DEGs related to photosynthesis were differently

267 regulated, i.e. chlorophyll synthase and the ferritin were up-regulated while the ferrochelatase was  
268 down-regulated. Importantly in durum wheat-specific network, there is also a central DEG  
269 (Traes\_3AS\_3CB8A9C01) for glutamate decarboxylase [GAD] which was up-regulated.

270 Figure 4 represented the genotype-specific networks of DEGs-metabolites reported in Table S7 and  
271 Table S8 for emmer (A) and durum wheat (B), respectively. As illustrated, the network structure was  
272 different between the two genotypes; consistently emmer-specific network showed a higher number  
273 of negative correlations between DEGs and metabolites while durum wheat-specific network has  
274 higher number of positively correlated DEGs and metabolites pairs. Of note, glutamic acid and valine  
275 were the metabolites highly connected to the other nodes in emmer-specific network while GABA,  
276 quinic acid, *myo*-inositol and valine were highly connected to the rest of the nodes in durum wheat-  
277 specific network.

278

### 279 **DEGs position on the genome**

280 We have also considered the position of DEGs in both genotypes on the physical map. In general, for  
281 each chromosome durum wheat showed a higher number of DEGs compared to emmer. In both  
282 genotypes, the larger number of DEGs was located on chromosome 2A, 2B, 4A, 5A and 5B, while  
283 lower number of genes was found in the chromosome 3B. Few genes were in chromosome 6B in  
284 emmer (Figure S1).

285 Figure 5 illustrates the location of down- and up-regulated DEGs with central role in the  
286 corresponding genotype-specific networks. Observing the results, the higher number of central nodes  
287 in the emmer-specific network was located on chromosome 2B, 4B, and 5A, while for durum wheat-  
288 specific network the higher number of central DEGs was located on chromosome 2A, 2B, 4A and  
289 5B.

## 290 **Discussion**

291 In a preceding work we found that emmer and durum wheat showed contrasting phenotypic responses  
292 associated to N starvation (Gioia *et al.*, 2015). Here we present the results of gene expression and  
293 metabolites levels of emmer and durum wheat using two representative genotypes which were part  
294 of the previous investigation. Indeed, a striking result showed by our study is the major differences  
295 in the response to N starvation between our emmer and durum wheat genotypes based on their gene  
296 expression and metabolite levels. Emmer responded to the stress condition by slowing down all the  
297 metabolic functions, probably limiting his energy expenditure. On the contrary, durum wheat  
298 responded to the stress condition by activating a much larger number of genes (e.g. triggering more  
299 defense responsive pathways) and mechanisms resulting in an accumulation of metabolites in the  
300 investigated tissues (leaves) most likely associated to a metabolic imbalance. Moreover, evaluating  
301 the differences in plant growth, a significant growth variation under N starvation was observed in  
302 both genotypes according to the results reported by Gioia *et al.* (2015) which was more evident in the  
303 aerial part in durum wheat and in the below-ground part in emmer.

304 Durum wheat responded to N starvation with a much higher number of DEGs up-regulated. Some of  
305 these genes, directly involved in N metabolism, were differentially expressed exclusively in durum  
306 wheat (i.e. NR (up-regulated), GS and GDH (down-regulated)). In addition, the results of gene  
307 enrichment analysis indicate that emmer and durum wheat adapt to nitrogen starvation by a  
308 reprogramming of transcription. Transcription factors are important for controlling the expression of  
309 other genes in plant exposed to limited N condition or in complete starvation (Krapp *et al.*, 2011;  
310 Yang *et al.*, 2015; Curci *et al.*, 2017) and, accordingly, our results showed as the regulation of  
311 transcripts was highly different and, in some case, with an opposite trend between emmer and durum  
312 wheat. In addition, some GO categories were only enriched for the DEGs in durum wheat, such as:  
313 the cellular amino acids, oxoacid or organic acids metabolism which were also highlighted by Huang  
314 *et al.* (2016) in their study on the transcriptomic evaluation in response to the imbalance of carbon:  
315 nitrogen ratio in rice seedling.

316 Moreover, the levels of metabolites showed significant differences in response to the N starvation in  
317 both emmer and durum wheat. In general, in stressed conditions a reduction in plant growth and  
318 photosynthesis is expected (Shaar-Moshe *et al.*, 2018) and, consequently, this should lead to a  
319 decrease in monosaccharides content. Nevertheless, an increase in the starch and soluble sugars  
320 content was reported in the shoot of *Arabidopsis thaliana* under N starvation (Krapp *et al.*, 2011).  
321 Accordingly, an increase of total sugars in both genotypes was observed, with a pronounced effect in  
322 durum wheat (which also showed a significant decrease of photosynthetic efficiency).

323 Consistently to the differences observed at transcriptomic level, the content of amino acids, under N  
324 starvation was lower in emmer (fold change = -2.7), while in durum wheat a higher accumulation  
325 (fold change= 1.7) of these metabolites was observed. Tschoep *et al.* (2009) showed that when  
326 *Arabidopsis* plants were grown under continuous N limitation, the total amino acids levels were found  
327 to be higher than under high N condition due to a metabolic imbalance. The results obtained in our  
328 conditions suggest a reduced use of amino acids for protein synthesis and growth in durum wheat that  
329 links with the reduction of photosynthetic activity under N starvation. On the other hand, the lower  
330 accumulation in emmer may indicate an earlier phase of the N starvation syndrome which could result  
331 in a drastically reduced, but still efficient, metabolism.

332 In this sense, it is also important to discuss carefully the behaviors of both glutamic acid and  
333 GABA, both altered in response to the N starvation condition in emmer and durum wheat. GABA is  
334 synthesized mainly from glutamate, closely associated with the TCA cycle, and having a signaling  
335 role (Bouchè and Fromm, 2004; Fait *et al.*, 2008, Caldana *et al.*, 2011). Two studies have suggested  
336 a signaling role of GABA during the nitrate uptake in both *Brassica napus* root (Beuve *et al.*, 2004)  
337 and *Arabidopsis thaliana* (Barbosa *et al.*, 2010). Moreover, Sulieman (2011) reported the important  
338 role of GABA in increasing of the efficiency of symbiotic N<sub>2</sub> fixation in legumes. Michaeli and  
339 Fromm (2015), proposed that the metabolic and signaling functions of GABA has been evolved to be  
340 functionally entwined under nutrient starvation. Thus, it seems that GABA levels increase during  
341 plant nutrient starvation and energetically demanding stresses (Carillo, 2018), aspect that could be  
342 supported, from our data, by the negative correlation between the SPAD values (indicating reduced  
343 chlorophyll content) and the GABA content in durum wheat ( $r = -0.86$ ;  $P = 0.0061$ ). On the other  
344 hand, Forde and Lea (2007) reported the possible long-distance signaling role of glutamate between  
345 shoot and root as part of a network of N signaling pathways that enable the plant to monitor and adapt  
346 to changes in N status. In their model, when the shoot-derived glutamate arrive at the root tip, is  
347 sensed by plasma membrane glutamate receptors enabling meristematic activity in the root tip to  
348 respond to changes in the N/C status of the shoot. In our study the positive correlation in emmer  
349 between shoot glutamate and SRL ( $r = 0.97$ ;  $P = 0.0001$ ) could support this suggestion. In addition,  
350 the increase of the root morphological parameters in emmer under N starvation could be also  
351 sustained by a greater remobilization of the amino acids from the shoot to the root. The key role of  
352 GABA and glutamate is also supported by the results of the correlation-based network analysis  
353 integrating the information from both metabolites and transcripts. Indeed, durum wheat-specific  
354 network was characterized by the role of GABA that was associated to many (479) DEGs while in  
355 emmer-specific networks the glutamate was highly connected to many (201) other DEGs. This  
356 finding, on one hand, underlies their important role as signaling metabolites in stress conditions as

357 those occurring during nitrogen starvation and, on the other hand, it may suggest the occurrence of  
358 two contrasting strategies based on GABA and glutamate signaling that appear associated to shoot  
359 and root growth, respectively.

360 The genotype-specific networks of the two tetraploid wheats showed different structures. Overall,  
361 only one DEG (down-regulated) common to both emmer and durum wheat showed a central role in  
362 the corresponding networks (i.e. Stress Enhanced Protein 2 -[SEP2]) which is a light-inducible gene  
363 as showed in *Arabidopsis thaliana* and rice (Umate, 2010). A previous work reported that the  
364 regulation of SEP gene expression by light stress is very specific while other physiological stresses,  
365 such as: cold, heat, wounding, desiccation, salt or oxidative stress, did not promote accumulation of  
366 SEP transcripts indicating that they were not triggered by photooxidative damage itself (Heddad and  
367 Adamska, 2000). Therefore, based on our results we can speculate that SEP2 is inducible by both  
368 light and N starvation.

369 Among the genes having a central role in the durum wheat-specific network, there were some  
370 transcription factors (i.e. DEAD-box ATP-dependent RNA helicase 3[DEAD-box RH3] and the  
371 MIKC-type MADS-box transcription factor) as well as some stress responsive genes (i.e. peroxidase  
372 and protein detoxification). For example, as well documented, the DEAD-box RNA helicases are  
373 involved in RNA metabolism and have important roles in diverse cellular functions (e.g. plant growth  
374 and development, and in response to biotic and abiotic stresses (Vashisht and Tuteja, 2006; Li *et al.*,  
375 2008; Linder and Jankowsky, 2011; Zhu *et al.*, 2015). Recently, Gu *et al.* (2014) demonstrated the  
376 relevant role of the chloroplast DEAD-box RH3 on the growth and stress response in *Arabidopsis*  
377 *thaliana*. Interestingly, it is reported that in bread wheat the MIKC-type MADS-box TFs have key  
378 roles in plant growth (Ma *et al.*, 2017; Li *et al.*, 2018); however, even if one of these transcription  
379 factors (Traes\_5AL\_13E2DEC48) was a central node in the durum wheat-specific network, it was  
380 down-regulated under N starvation in comparison to the optimal N condition.

381 Moreover, several studies reported that in wheat, grown in either in field or greenhouse conditions,  
382 activities of many enzymes in the antioxidant defense system (i.e. SOD, CAT, GPX, GR, Prx and  
383 LOX) are altered to control the oxidative stress induced by other factors and to maintain the balance  
384 between ROS production and detoxification which avoid potential damage to cellular components,  
385 metabolism, development and growth system (Mittler *et al.*, 2004; Caverzan *et al.*, 2016 and reference  
386 therein). For example, Kumar *et al.* (2013) reported an increase of SOD transcript in wheat in  
387 response to heat shock treatment that may indicate greater tolerance to environmental stresses. Also,  
388 in this study, many important genes related to the antioxidant defense system were up-regulated in  
389 both genotypes but with a ratio of 1:2 between emmer and durum wheat.

390 The up-regulation of genes involved in the defense-system and the increase in the content of  
391 metabolites under starvation observed in durum wheat suggest that a possible mechanism of response  
392 to the starvation may be linked to the autophagy. This process is inducible in different and multiple  
393 stress condition or development stages, and it is defined as a non-specific degradation process for the  
394 recycling of intracellular material that might be used as building blocks to temporarily overcome the  
395 absence of nutrients (Liu and Bassham, 2012; Pérez-Pérez *et al.*, 2012). Nutrient limitation also  
396 increases ROS production, which in turn may stimulate autophagy functioning as signaling molecules  
397 as suggested by Liu *et al.* (2009). Taken together, these findings indicate that the absence of nutrients  
398 is a primary signal leading to autophagy activation in eukaryotes, but this stress signal is tightly  
399 associated with the production and accumulation of ROS. Because in plants the chloroplasts are  
400 primary source of ROS, their degradation through autophagic processes may be highly possible as  
401 also reported under carbon-limited conditions (Wada *et al.*, 2009).

402 To face environmental constrains, according to the plant-life history (the distribution of  
403 resources between growth, reproduction and defense), plants can combine acclimation mechanisms  
404 from different strategies defined as escape or resistance (Shaar-Moshe *et al.*, 2018 and references  
405 therein). In this sense, probably, emmer as adaptive strategy to N starvation relied mainly on the  
406 below-ground part while the durum wheat reacts on the up-ground part. Although our experiment did  
407 not analyze the transcriptomic and/or metabolomics responses of the roots, it provides important  
408 information with respect to differential response on the level of gene and metabolites involving in the  
409 efforts of this crop to retain homeostasis under nutrient stress conditions. Indeed, the responses of  
410 emmer appear more plastic with enhanced activation of root growth under N starvation then durum  
411 which trigger to maintain growth rate even in absence of available N.

412

## 413 **Experimental Procedures**

### 414 **Plant materials and experimental design**

415 Two genotypes of *Triticum turgidum* were considered: one emmer (*T. turgidum* ssp. *dicoccum*)  
416 named 'Molise Selezione Colli', a pure line selected from a local population, and one modern durum  
417 wheat cultivar (*T. turgidum* ssp. *durum*) named 'Simeto' (derived from Capeiti/Valnova), released in  
418 Italy in 1988. They showed many contrasting traits including differences in grain yield (GY), heading  
419 date (HD), plant height (PH), test weight (TW), thousand kernel weight (TKW), protein content (PC),  
420 yellow index (YI), gluten index (GI), roots and shoot morphological parameters (De Vita *et al.*, 2006,  
421 2007; Iannucci *et al.*, 2017).

422 Both genotypes were previously purified by two cycles of Single Seed Descent (SSD). The samples  
423 were part of a larger four-week-long experiment conducted in 2012 under N-optimal and N-starvation



424 conditions in the PhyTec Experimental Greenhouse at the Institute of Biosciences and Geosciences  
425 (IBG-2): Plant Sciences Institute, Forschungszentrum Jülich GmbH, Germany (50°54'36''N,  
426 06°24'49''E) which included 12 genotypes for each tetraploid wheat subspecies. The resulting 36  
427 genotypes were grown under two different N conditions with two replicates per genotype in two  
428 subsequent growing conditions. Thus, for each treatment genotypes were replicated four times using  
429 two plants per replicate with overall 8 plants per genotype per treatment. Each rhizobox contained  
430 two different genotypes of the same subspecies, each represented by two plants arranged to avoid  
431 contacts between roots of different genotypes. This means that the two genotypes considered here  
432 were grown in four different rhizoboxes for each N condition. Before sowing, for each genotype,  
433 grains of uniform size were visually selected, surface sterilized (1% NaClO (w/v) for 15 min and  
434 rinsed 10 times with deionized water), pre-germinated and then transplanted into the soil-filled  
435 rhizoboxes. The soil used to fill the rhizoboxes (volume of ~18 l) was a 'Typ 0' manually sieved peat  
436 soil (Nullerde Einheitserde; Balster Einheitserdewerk, Frondenberg, Germany), which provided low  
437 nutrient availability, with a pH of 6.1, and the available phosphate, potassium, magnesium,  
438 ammonium nitrogen, and nitrate nitrogen concentrations of 7.0, 15.0, 98.0, <1.0, and <1.0 mg l<sup>-1</sup>,  
439 respectively. All plants were watered regularly twice a day with 400 ml of tap water and supplied  
440 three times per week with 200 ml of modified Hoagland solution (Hoagland and Arnon, 1950) with  
441 or without added nitrogen. For the optimal nitrogen condition, the stock solution included 5 mM  
442 KNO<sub>3</sub>, 5 mM Ca(NO<sub>3</sub>)<sub>2</sub>, 2 mM MgSO<sub>4</sub>, 1 mM KH<sub>2</sub>PO<sub>4</sub>, plus trace elements while for the nitrogen-  
443 starvation solutions, 1 mM KNO<sub>3</sub> and 5 mM Ca(NO<sub>3</sub>)<sub>2</sub> were replaced by 2.5 mM K<sub>2</sub>SO<sub>4</sub> and 5 mM  
444 CaCl<sub>2</sub>·6(H<sub>2</sub>O), respectively. The experiments were carried out under natural lighting in a greenhouse,  
445 with the air temperature kept between 18 and 24 °C, and the relative humidity between 40 and 60%.  
446 For more details concerning the experiment and growth conditions see Gioia *et al.* (2015). At the end  
447 of the experiment, for each replicate, leaves of the two plants were pooled and immediately frozen in  
448 liquid nitrogen to obtain leaves tissues for RNA and metabolites extraction.

449

#### 450 **Phenotypic traits**

451 The following traits were scored for both genotypes: the total leaf area (TLA), the total number of  
452 leaves (TLN), and the principal parameters of the root system architecture, such as: visible primary  
453 root length (PRL), visible lateral root length (LRL), total root length (TRL) of all visible roots, root  
454 system depth (RSD), and root system width (RSW). At the end of the experiment, at 28 days after  
455 sowing (DAS) (Zadoks stage 14–18 for optimal N; Zadoks stage 12–14 for N starvation; Zadoks *et*  
456 *al.*, 1974), the chlorophyll content (SPAD units) was estimated with a SPAD-502 chlorophyll meter  
457 (Minolta Corp., Ramsey, NJ, USA). In addition, wheat plants were harvested to determine the shoot



458 fresh weight (SFW) and the root biomass (root dry weight; RDW) after a careful washing and oven  
459 drying. More details of each determination were reported in Gioia *et al.* (2015).

460

#### 461 **Transcriptomic analysis**

462 RNA extraction was performed using 100 mg of frozen ground tissue (leaves) and treated with  
463 RNase-Free DNase by the On-Column DNase I Digestion Set (Sigma-Aldrich). For the subsequent  
464 analysis only RNA samples with integrity greater than 8.0 were used. Library construction and RNA  
465 sequencing were carried out at the Montpellier Genomix (<http://www.mgx.cnrs.fr>) sequencing  
466 facility. Libraries quantification, RNA-Seq data filtering and processing used in this study were  
467 essentially as those described previously by David *et al.* (2014). The bread wheat chromosome survey  
468 sequence for the cv. Chinese Spring ([http://plants.ensembl.org/triticum\\_aestivum](http://plants.ensembl.org/triticum_aestivum)) generated by the  
469 International Wheat Genome Sequencing Consortium (IWGSC) was used as the reference assembly.  
470 The Biomart package of EnSEMBL were used to acquire the transcripts, and the physical genomic  
471 location of the 66,307 genes was predicted from the IWGSC on the genome A and B (Ensembl release  
472 22, <http://plants.ensembl.org/biomart/martview/>). Since these sequences were obtained by separately  
473 sequencing each bread wheat chromosome arm, the bread wheat reference helped to distinguish  
474 paralogous durum wheat copies.

475 RNA-Seq reads were mapped on the bread wheat reference transcriptome using BWA (Li and Durbin,  
476 2009) while allowing 3 errors (-n 3 in the alignment step). Picard tools (<http://picard.sourceforge.net>)  
477 were used to remove PCR and optical duplicates. Rough read counts were computed at all sites for  
478 each individual using the idxstats function of the Samtools.

479

#### 480 **Metabolite Profiling**

481 After collection, part of the frozen leaves of each replicate were freeze-dried and successively milled  
482 using a Pulverisette 7 Planetary Micro Mill (Classic Line, Fritsch) with an agate jar and balls, and  
483 stored a -20°C until analysis.

484 A total of 30 mg dry weight (dw) of each replicate was used for the extraction, derivatisation and  
485 analysis by gas chromatography–mass spectrometry (GC-MS) of the polar and non-polar metabolites  
486 as previously described (Beleggia *et al.*, 2013). Metabolites were identified by comparing the mass  
487 spectrometry data with those of a custom library obtained with reference compounds and with those  
488 of the National Institute of Standards and Technology (NIST 2011) database. The chromatograms  
489 and mass spectra evaluation and quantification were performed using the Mass Hunter software.

490 The standards and all the chemicals used were HPLC grade (Sigma-Aldrich Chemical Co.,  
491 Deisenhofen, Germany).

## 492 **Statistical analysis**

493 Analysis of variance (ANOVA) was carried out with respect to each morphological trait and  
494 metabolite detected in the shoot of emmer and durum wheat lines considered. Mean discrimination  
495 between emmer and durum was performed applying Tukey's test and statistically significant  
496 differences were determined at the significance level of  $\alpha=0.05$ . Statistical analysis of the data was  
497 performed using the JMP software (SAS Institute Inc., Cary, NC, USA version 8).

## 499 **Bioinformatics analysis and network construction**

### 500 Data preprocessing

501 First, genes for which the count per million (cpm) for a single sample was smaller than one and the  
502 sum of cpms across all samples was smaller than the total number of samples were filtered out. Raw  
503 counts were first normalized using trimmed mean of M-values normalization method (R package  
504 edgeR (Robinson *et al.*, 2010) and then voom normalized using the R package limma (Smyth, 2005).

### 505 Analysis of differential expression

506 Analysis of differential expression was conducted on the data after data preprocessing. DEGs were  
507 determined between N starvation and a control with optimal N level for the following scenarios: (i)  
508 for each genotype and (ii) between the two genotypes. For the two scenarios, a linear model was  
509 employed to determine differential behavior. To this end, we applied the R package limma (Smyth,  
510 2005).

### 511 GO enrichment analysis

512 Annotations were extracted from EnsemblPlants (Kinsella *et al.*, 2011)  
513 (<http://plants.ensembl.org/biomart/martview/2ace56daacae40bad4af00cc25d51e4f>) and agriGO  
514 (<http://bioinfo.cau.edu.cn/agriGO/download.php>) (Du *et al.*, 2010). We used hypergeometric test  
515 (Kachitvichyanukul and Schmeiser, 1985) to identify enriched terms in the list of DEGs. The cut-off  
516 value for significance level was considered as 0.05 after FDR correction.

### 517 Network analysis

518 Co-expression networks were extracted by applying Pearson correlation on all pairs of data profiles,  
519 resulting in a similarity matrix  $S_{m \times m}$ . We then build a network  $G = (V, E)$  with  $m$  nodes,  
520 corresponding to the DEGs; there is an edge between two nodes  $i, j \in V(G)$  if and only if the  
521 entries  $s_{ij}$  of  $S$  is significant at the level of 0.05, after FDR correction.

522 Co-expression networks are separately reconstructed for the data from each genotype (*i.e.*, Molise  
523 Sel. Colli and Simeto), by identifying significant correlation coefficients between each pair of genes  
524 in the network ( $p$  value  $< 0.05$ , FDR corrected). For each pair of genes in the network, the Fisher Z-  
525 score test is used to assess the significance of the difference between the correlation coefficients

526 obtained from emmer and durum wheat data. The edge between a pair of genes is referred to as a  
527 *significantly different edge* if the obtained p-value from Fisher Z-score test is smaller than 0.05 after  
528 FDR correction. The degree and the betweenness centralities of all nodes (i.e. DEGs) in co-expression  
529 networks and the differential networks were calculated using the R package igraph (Csardi and  
530 Nepusz, 2006). The same analysis was repeated for metabolite data, and integration of metabolite and  
531 transcript data; however, the entire metabolite profiles were used in these cases.

532 To find the nodes (i.e., genes and metabolites) which capture the differences between the two  
533 genotypes, we scored the nodes by the number of correlations of value larger than  $\tau$  ( $\tau$  was considered  
534 to be 0.6 and 0.8) present in emmer but not in durum wheat co-expression network and vice versa.

535

### 536 **Funding**

537 This work was supported by the PON a3 PIASS Project. PIASS -Platform for Agrofood Science and  
538 Safety and by the Transnational Access capacities of the European Plant Phenotyping Network  
539 (EPPN, grant agreement no. 284443) funded by the FP7 Research Infrastructures Programme of the  
540 European Union.

541

### 542 **Author Contributions**

543 RB and RP conceived and designed the study. TG, FF, US carried out the experiments and performed  
544 the morphological analysis; RB and FN performed the metabolite analyses. YH and JD performed  
545 the RNAseq analysis; NO and ZN performed the bioinformatics and network analyses. RB, RP, NO  
546 and ZN analyzed data and wrote the paper. NP and PDV reviewed the manuscript. All authors read  
547 and approved the final manuscript.

548

### 549 **Acknowledgments**

550 The authors are thankful to Assaf Distelfeld for providing genomic information and for a critical  
551 reading of the manuscript. TG thanks the SIR-MIUR grant number [RBSI14SJ81]. NO and ZN  
552 acknowledge the support from Horizon 2020 Teaming project PlantaSyst (EU). RP thanks the  
553 Università Politecnica delle Marche financial support.

554

### 555 **Conflict of Interest**

556 The authors declare no conflict of interest.

557

558

559

560 **References**

- 561 **Amiour, N., Imbaud, S., Clément, G., Agier, N., Zivy, M., Valot, B., Balliau, T., Armengaud, P.,**  
562 **Quilleré, I., Cañas, R., Tercet-Laforgue, T., Hirel, B.** (2012) The use of metabolomics integrated  
563 with transcriptomic and proteomic studies for identifying key steps involved in the control of nitrogen  
564 metabolism in crops such as maize. *J. Exp. Bot.* **63**(14), 5017–5033.
- 565 **Ayadi, S., Karmous, C., Hammami, Z., Trifa, Y., Rezgui, S.** (2014) Variation of Durum Wheat  
566 Yield and Nitrogen Use Efficiency under Mediterranean Rainfed Environment. *Intl. J. Agri Crop Sci.*  
567 **7**(10), 693–699.
- 568 **Barbosa, J.M., Singh, N.K., Cherry, J.H., Locy, R.D.** (2010) Nitrate uptake and utilization is  
569 modulated by exogenous  $\gamma$ -aminobutyric acid in *Arabidopsis thaliana* seedlings. *Plant Physiol.*  
570 *Biochem.* **48**, 443–450.
- 571 **Beleggia, R., Platani, C., Nigro, F., DeVita, P., Cattivelli, L., Papa, R.** (2013) Effect of genotype,  
572 environment and genotype-by-environment interaction on metabolite profiling in durum wheat  
573 (*Triticum durum* Desf.) grain. *J. Cereal Sci.* **57**, 183–192.
- 574 **Beleggia, R., Rau, D., Laidò, G., Platani, C., Nigro, F., Fragasso, M., De Vita, P., Scossa, F.,**  
575 **Fernie, A.R., Nikoloski, Z., Papa, R.** (2016) Evolutionary Metabolomics Reveals Domestication-  
576 Associated Changes in Tetraploid Wheat Kernels. *Mol. Biol. Evol.* **33**(7), 1740–1753.
- 577 **Beuve, N., Rispaill, N., Laine, P., Cliquet, J.-B., Ourry, A., Le Deunff, E.** (2004) Putative role of  
578  $\gamma$ -aminobutyric acid (GABA) as a long-distance signal in up-regulation of nitrate uptake in *Brassica*  
579 *napus* L. *Plant Cell Environ.* **27**, 1035–1046.
- 580 **Bielecka, M., Watanabe, M., Morcuende, R., Scheible, W.-R., Hawkesford, M.J., Hesse, H.,**  
581 **Hoefgen, R.** (2015) Transcriptome and metabolome analysis of plant sulfate starvation and resupply  
582 provides novel information on transcriptional regulation of metabolism associated with sulfur,  
583 nitrogen and phosphorus nutritional responses in *Arabidopsis*. *Front. Plant Sci.* **5**, 805.
- 584 **Bouché, N. and Fromm, H.** (2004) GABA in plants: just a metabolite? *TRENDS Plant Sci.* **9**, 3.
- 585 **Caldana, C., Degenkolbe, T., Cuadros-Inostroza, A., Klie, S., Sulpice, R., Leisse, A.,**  
586 **Steinhauser, D., Fernie, A.R., Willmitzer, L., Hannah, M.A.** (2011) High-density kinetic analysis  
587 of the metabolomic and transcriptomic response of *Arabidopsis* to eight environmental  
588 conditions. *Plant J.* **67**(5), 869–884.
- 589 **Carillo, P.** (2018) GABA Shunt in Durum Wheat. *Front. Plant Sci.* **9**, 100.
- 590 **Cassman, K.G., Dobermann, A., Walters, D.T., Yang, H.** (2003) Meeting cereal demand while  
591 protecting natural resources and improving environmental quality. *Ann. Rev. Environ. Res.* **28**, 315–  
592 358.

- 593 **Caverzan, A., Casassola, A., Patussi Brammer, S.** (2016) Antioxidant responses of wheat plants  
594 under stress. *Genet. Mol. Biol.* **39**(1), 1–6.
- 595 **Chen, R., Tian, M., Wu, X., Huang, Y.** (2011) Differential global gene expression changes in  
596 response to low nitrogen stress in two maize inbred lines with contrasting low nitrogen tolerance.  
597 *Genes Genom.* **33**, 491–497.
- 598 **Csardi, G. and Nepusz, T.** (2006) The igraph software package for complex network research. *Inter.*  
599 *Journal [Internet].;Complex Sy:1695.*
- 600 **Curci, P.L., Aiese Cigliano, R., Zuluaga, D.L., Janni, M., Sanseverino, W., Sonnante, G.** (2017)  
601 Transcriptomic response of durum wheat to nitrogen starvation. *Sci. Rep.* **7**, 1176.
- 602 **David, J., Holtz, Y., Ranwez, V., Santoni, S., Sarah, G., Ardisson, M., Poux, G., Choulet, F.,**  
603 **Genthon, C., Roumet, P., Tavaud-Pirra, M.** (2014) Genotyping by sequencing transcriptomes in  
604 an evolutionary pre-breeding durum wheat population. *Mol Breed.* **34**, 1531–1548.
- 605 **De Vita, P., Riefolo, C., Codianni, P., Cattivelli, L., Fares, C.** (2006) Agronomic and qualitative  
606 traits of *T. turgidum* ssp. *dicoccum* genotypes cultivated in Italy. *Euphytica* **150**, 195–205.
- 607 **De Vita, P., Mastrangelo, A.M., Codianni, P., Fornara, M., Palumbo, M., Cattivelli, L.** (2007)  
608 Bio-agronomic evaluation of old and modern wheat spelt and emmer genotypes for Low-input  
609 farming in mediterranean environment. *Ital. J. Agron.* **3**, 291–302.
- 610 **Du, Z., Zhou, X., Ling, Y., Zhang, Z., Su, Z., Z, D, et al.** (2010) agriGO: a GO analysis toolkit for  
611 the agricultural community. *Nucleic Acids Res [Internet];38(Web Server issue), W64-70.*
- 612 **Fait, A., Fromm, H., Walter, D., Galili, G., Fernie, A.R.** (2008) Highway or byway: the metabolic  
613 role of the GABA shunt in plants. *Trends Plant Sci.* **13**, 1.
- 614 **Forde, B.G. and Lea, P.J.** (2007) Glutamate in plants: metabolism, regulation, and signaling. *J. Exp.*  
615 *Bot.* **58**(9), 2339–2358.
- 616 **Gelli, M., Duo, Y., Konda, A.R., Zhang, C., Holding, D., Dweikat, I.** (2014) Identification of  
617 differentially expressed genes between sorghum genotypes with contrasting nitrogen stress tolerance  
618 by genome-wide transcriptional profiling. *BMC Genomics* **15**, 179.
- 619 **Gioia, T., Nagel, K.A., Beleggia, R., Fragasso, M., Ficco, D.B.M., Pieruschka, R., De Vita, P.,**  
620 **Fiorani, F., Papa, R.** (2015) Impact of domestication on the phenotypic architecture of durum wheat  
621 under contrasting nitrogen fertilization. *J. Exp. Bot.* **66**(18), 5519-5530.
- 622 **Godfray, H.C.J., Beddington, J.R., Crute, I.R., Haddad, L., Lawrence, D., Muir, J.F., Pretty,**  
623 **J., Robinson, S., Thomas, S.M., Toulmin, C.** (2010) Food security: the challenge of feeding 9  
624 billion people. *Science* **327**, 812–818.

- 625 **Guo, T., Xuan, H., Yang, Y., Wang, L., Wei, L., Wang, Y., Kang, G.** (2014) Transcription  
626 Analysis of Genes Encoding the Wheat Root Transporter NRT1 and NRT2 Families During Nitrogen  
627 Starvation. *J. Plant Growth Regul.* **33**(4), 837-848.
- 628 **Gu, L., Xu, T., Lee, K., Lee, K.H., Kang, H.** (2014) A chloroplast-localized DEAD-box RNA  
629 helicase AtRH3 is essential for intron splicing and plays an important role in the growth and stress  
630 response in *Arabidopsis thaliana*. *Plant Physiol. Biochem.* **82**, 309–318.
- 631 **Hao, Q.N., Zhou, X.A., Sha, A.H., Wang, C., Zhou, R., Chen, S.L.** (2011) Identification of genes  
632 associated with nitrogen-use efficiency by genome-wide transcriptional analysis of two soybean  
633 genotypes. *BMC Genomics* **12**, 525.
- 634 **Hawkesford, M.J.** (2017) Genetic variation in traits for nitrogen use efficiency in wheat. *J. Exp. Bot.*  
635 **68**(10), 2627-2632.
- 636 **Heddad, M. and Adamska, I.** (2000). Light stress-regulated two-helix proteins in *Arabidopsis*  
637 *thaliana* related to the chlorophyll a/b-binding gene family. *PNAS* **97**(7), 3741–3746.
- 638 **Hirai, M.Y., Klein, M., Fujikawa, Y., Yano, M., Goodenowe, D.B., Yamazaki, Y., Kanaya, S.,**  
639 **Nakamura, Y., Kitayama, M., Suzuki H.** (2005) Elucidation of gene-to-gene and metabolite-to-  
640 gene networks in *Arabidopsis* by integration of metabolomics and transcriptomics. *J Biol Chem.*  
641 **280**(27), 25590–25595.
- 642 **Hoagland, D.R. and Arnon, D.I.** (1950). The water-culture method for growing plants without soil.  
643 Circular 347. Berkeley, CA: California Agricultural Experiment Station.
- 644 **Huang, A., Sang, Y., Sun, W., Fu, Y., Yang, Z.** (2016) Transcriptomic Analysis of Responses to  
645 Imbalanced Carbon:Nitrogen Availabilities in Rice Seedlings. *PLoS ONE* **11**(11), e0165732.
- 646 **Humbert, S., Subedi, S., Cohn, J., Zeng, B., Bi, Y.-M., Chen, X., Zhu, T., McNicholas, P.D.,**  
647 **Rothstein, S.J.** (2013) Genome-wide expression profiling of maize in response to individual and  
648 combined water and nitrogen stresses. *BMC Genomics* **14**, 3.
- 649 **Iannucci, A., Marone, D., Russo, M.A., De Vita, P., Miullo, V., Ferragonio, P., Blanco, A.,**  
650 **Gadaleta, A., Mastrangelo, A.M.** (2017) Mapping QTL for Root and Shoot Morphological Traits  
651 in a Durum Wheat×T. dicocum Segregating Population at Seedling Stage. *Int. J. Genomics* Article  
652 ID 6876393.
- 653 **Kachitvichyanukul, V. and Schmeiser, B.** (1985) Computer generation of hypergeometric random  
654 variates. *J Stat Comput Simul* [Internet]. Gordon and Breach Science Publishers; **22**(2), 127–45.
- 655 **Kant, S., Yong-Mei Bi, Y.-M., Rothstein, S.J.** (2011) Understanding plant response to nitrogen  
656 limitation for the improvement of crop nitrogen use efficiency. *J. Exp. Bot.* **62**(4), 1499–1509.
- 657 **Kinsella, R.J., Kähäri, A., Haider, S., Zamora, J., Proctor, G., Spudich, G., Almeida-King, J.,**  
658 **Staines, D., Derwent, P., Kerhornou, A., Kersey, P., Flicek, P.** (2011) Ensembl BioMarts: a hub



- 659 for data retrieval across taxonomic space. Database [Internet]. Oxford University Press; 2011(0),  
660 bar030-bar030.
- 661 **Krapp, A., Berthomé, R., Orsel, M., Mercey-Boutet, S., Yu, A., Castaings, L., Elftieh, S., Major,**  
662 **H., Renou, J.-P., Daniel-Vedele, F.** (2011) Arabidopsis roots show distinct temporal adaptation  
663 patterns towards nitrogen starvation. *Plant Physiol.* **157**, 1255–1282.
- 664 **Kumar, R.R., Sharma, S.K., Goswami, S., Singh, K., Gadpayle, K.A., Singh, G.P., Pathak, H.,**  
665 **Rai, R.D.** (2013) Transcript profiling and biochemical characterization of mitochondrial superoxide  
666 dismutase (mtSOD) in wheat (*Triticum aestivum*) under different exogenous stresses. *Aust. J. Crop*  
667 *Sci.* **7**(3), 414–424.
- 668 **Lea, P.J. and Azevedo, R.A.** (2006) Nitrogen use efficiency. 1. Uptake of nitrogen from the soil.  
669 *Ann. App. Biol.* **149**, 243–247.
- 670 **Li, H. and Durbin, R.** (2009) Fast and accurate short read alignment with Burrows-Wheeler  
671 transform. *Bioinformatics* **25**, 1754–1760.
- 672 **Li, D., Liu, H., Zhang, H., Wang, X., Song, F.** (2008) OsBIRH1, a DEAD-box RNA helicase with  
673 functions in modulating defence responses against pathogen infection and oxidative stress. *J. Exp.*  
674 *Bot.* **59**(8), 2133–46.
- 675 **Li, Y., Fu, X., Zhao, M., Zhang, W., Li, B., An, D., Li, J., Zhang, A., Liu, R., Liu, X.** (2018) A  
676 Genome-wide View of Transcriptome Dynamics During Early Spike Development in Bread Wheat.  
677 *Sci. Rep.* **8**, 15338.
- 678 **Linder, P. and Jankowsky, E.** (2011) From unwinding to clamping — the DEAD box RNA  
679 helicase family. *Nature Reviews, Mol. Cell Biol.* **12**, 505–516.
- 680 **Liu, Y. and Bassham, D.C.** (2012) Autophagy: Pathways for Self-Eating in Plant Cells. *Annu. Rev.*  
681 *Plant Biol.* **63**, 215–37.
- 682 **Liu, Y., Xiong, Y., Bassham, D.C.** (2009) Autophagy is required for tolerance of drought and salt  
683 stress in plants. *Autophagy* **5**, 954–63.
- 684 **Luo, M.C., Yang, Z.L., You, F.M., Kawahara, T., Waines, J.G., Dvorak, J.** (2007) The structure  
685 of wild and domesticated emmer wheat populations, gene flow between them, and the site of emmer  
686 domestication. *Theor. Appl. Genet.* **114**(6), 947-59.
- 687 **Ma, J., Yang, Y., Luo, W., Yang, C., Ding, P., Liu, Y., Qiao, L., Chang, Z., Geng, H., Wang, P.,**  
688 **Jiang, Q., Wang, J., Chen, G., Wei, Y., Zheng, Y., Lan, X.** (2017) Genome-wide identification and  
689 analysis of the MADS-box gene family in bread wheat (*Triticum aestivum* L.). *PLoS ONE* **12**(7),  
690 e0181443.
- 691 **Michaeli, S. and Fromm, H.** (2015) Closing the loop on the GABA shunt in plants: are GABA  
692 metabolism and signaling entwined? *Front. Plant Sci.* **6**, 419.



- 693 **Mittler, R., Vanderauwera, S., Gollery, M., Van Breusegem, F.** (2004) Reactive oxygen gene  
694 network of plants. *TRENDS Plant Sci.* **9**, 10.
- 695 **Miller, A.J., Fan, X., Orsel, M., Smith, S.J., Wells, D.M.** (2007) Nitrate transport and signaling. *J.*  
696 *Exp. Bot.* **58**, 2297–2306.
- 697 **Nesbitt, M. and Samuel, D.** (1998) Wheat domestication: archaeobotanical evidence. *Science*  
698 **279**(5356), 1431–1431.
- 699 **Nevo, E.** (2014) Evolution of wild emmer wheat and crop improvement. *J. Syst. Evol.* **52**(6), 673–  
700 696.
- 701 **Obata, T. and Fernie A.R.** (2012) The use of metabolomics to dissect plant responses to abiotic  
702 stresses. *Cell. Mol. Life Sci.* **69**, 3225–3243.
- 703 **Pérez-Pérez, M.E., Lemaire, S.D., Crespo, J.L.** (2012) Reactive Oxygen Species and Autophagy  
704 in Plants and Algae. *Plant Physiol.* **160**, 156–164.
- 705 **Raun, W.R. and Johnson, G.V.** (1999) Improving Nitrogen Use Efficiency for Cereal Production,  
706 REVIEW & INTERPRETATION *Agronomy J.* **91**(3), 357–363.
- 707 **Robinson, M.D., McCarthy, D.J., Smyth, G.K.** (2010) edgeR: a Bioconductor package for  
708 differential expression analysis of digital gene expression data. *Bioinformatics* [Internet]. Oxford  
709 University Press **26**(1), 139–40.
- 710 **Ruisi, P., Frangipane, B., Amato, G., Frenda, A.S., Plaia, A., Giambalvo, D., Saia, S.** (2015)  
711 Nitrogen uptake and nitrogen fertilizer recovery in old and modern wheat genotypes grown in the  
712 presence or absence of interspecific competition. *Front. Plant Sci.* **6**, 185.
- 713 **Russo, M.A., Ficco, D.B.M., Laidò, G., Marone, D., Papa, R., Blanco, A., Gadaleta, A., De Vita,**  
714 **P., Mastrangelo, A.M.** (2014) A dense durum wheat T. dicoccum linkage map based on SNP markers  
715 for the study of seed morphology. *Mol. Breed.* **34**, 1579–1597.
- 716 **Scheible, W.R., Morcuende, R., Czechowski, T., Fritz, C., Osuna, D., Palacios-Rojas, N.,**  
717 **Schindelasch, D., Thimm, O., Udvardi, M.K., Stitt, M.** (2004) Genome-Wide Reprogramming of  
718 Primary and Secondary Metabolism, Protein Synthesis, Cellular Growth Processes, and the  
719 Regulatory Infrastructure of Arabidopsis in Response to Nitrogen. *Plant Physiol.* **136**, 2483–2499.
- 720 **Shaar-Moshe, L., Hayouka, R., Roessner, U., Peleg, Z.** (2018) Phenotypic and metabolic plasticity  
721 shapes life-history strategies under combinations of abiotic stresses. *Plant Direct* **1**, 13.
- 722 **Simons, M., Saha, R., Guillard, L., Clément, G., Armengaud, P., Cañas, R., Maranas, C. D.,**  
723 **Lea, P.J., Hirel, B.** (2014) Nitrogen-use efficiency in maize (*Zea mays* L.): from ‘omics’ studies to  
724 metabolic modelling. *J. Exp. Bot.* **65**(19), 5657–5671.
- 725 **Smyth, G.K.** (2005) Limma: linear models for microarray data. In: Gentleman R, Carey V, Dudoit  
726 S, Irizarry R, Huber W, editors. *Bioinformatics and Computational Biology Solutions using R and*

- 727 Bioconductor. Springer, New York;. p. 397–420.
- 728 **Suliman, S.** (2011) Does GABA increase the efficiency of symbiotic N<sub>2</sub> fixation in legumes? *Plant*  
729 *Signal. Behav.* **6**(1), 32-36.
- 730 **Tanno, K.I. and Willcox, G.** (2006) How fast was wild wheat domesticated? *Science* **311**, 1886.
- 731 **Toubiana, D., Fernie, A.R., Nikoloski, Z., Fait, A.** (2012) Network analysis: tackling complex data  
732 to study plant metabolism. *Trends Biotechnol.* **31**(1), 29–36.
- 733 **Toubiana, D., Xue, W., Zhang, N., Kremling, K., Gur, A., Pilosof, S., Gibon, Y., Stitt, M.,**  
734 **Buckler, E.S., Fernie, A.R., Fait, A.** (2016) Correlation-Based Network Analysis of Metabolite and  
735 Enzyme Profiles Reveals a Role of Citrate Biosynthesis in Modulating N and C Metabolism in *Zea*  
736 *mays*. *Front. Plant Sci.* **7**, 1022.
- 737 **Tschoep, H., Gibon, Y., Carillo, P., Armengaud, P., Szecowka, M., Nunes-Nesi, A., Fernie, A.R.,**  
738 **Koehl, K., Stitt, M.** (2009) Adjustment of growth and central metabolism to a mild but sustained  
739 nitrogen-limitation in *Arabidopsis*. *Plant Cell Environ.* **32**, 300–318.
- 740 **Umate, P.** (2010) Genome-wide analysis of the family of light-harvesting chlorophyll a/b-binding  
741 proteins in *Arabidopsis* and rice, *Plant Signal. Behav.* **5**(12), 1537-1542.
- 742 **Vashisht, A.A. and Tuteja, N.** (2006) Stress responsive DEAD-box helicases: a new pathway to  
743 engineer plant stress tolerance. *J. Photochem. Photobiol. B: Biol.* **2**, 150–60.
- 744 **Vicente, R., Perez, P., Martinez-Carrasco, R., Feil, R., Lunn, J.E., Watanabe, M., Arrivault, S.,**  
745 **Stitt, M., Hoefgen, R., Morcuende, R.** (2016) Metabolic and Transcriptional Analysis of Durum  
746 Wheat Responses to Elevated CO<sub>2</sub> at Low and High Nitrate Supply. *Plant Cell Physiol.* **57**(10),  
747 2133–2146.
- 748 **Wada, S., Ishida, H., Izumi, M., Yoshimoto, K., Ohsumi, Y., Mae, T., Makino, A.** (2009)  
749 Autophagy plays a role in chloroplast degradation during senescence in individually darkened leaves.  
750 *Plant Physiol.* **149**, 885–893.
- 751 **Xu, G., Fan, X., Miller, A.J.** (2012) Plant nitrogen assimilation and use efficiency. *Plant Biol.* **63**,  
752 153–182.
- 753 **Yang, J., Chen, X., Zhu, C., Peng, X., He, X., Fu, J., Ouyang, L., Bian, J., Hu, L., Sun, X., Xu,**  
754 **J., He, H.** (2015) RNA-seq reveals differentially expressed genes of rice (*Oryza sativa*) spikelet in  
755 response to temperature interacting with nitrogen at meiosis stage. *BMC Genomics* **16**, 959.
- 756 **Yu, C., Zhao, X., Qi, G., Bai, Z., Wang, Y., Wang, S., Ma, Y., Liu, Q., Hu, R., Zhou, G.** (2017)  
757 Integrated analysis of transcriptome and metabolites reveals an essential role of metabolic flux in  
758 starch accumulation under nitrogen starvation in duckweed. *Biotechnol. Biofuels* **10**, 167.
- 759 **Zadoks, J.C., Changt, T.T., Konzak, C.F.** (1974) A decimal code for the growth stages of cereals.  
760 *Weed Res.* **14**, 415–421.

- 761 **Zhu, M., Chen, G., Dong, T., Wang, L., Zhang, J., Zhao, Z., Hu, Z.** (2015) *SIDEAD31*, a Putative  
762 DEAD-Box RNA Helicase Gene, Regulates Salt and Drought Tolerance and Stress-Related Genes in  
763 Tomato. *PLoS ONE* **10**(8), e0133849.
- 764 **Zuluaga, D.L., De Paola, D., Janni, M., Curci, P.L., Sonnante, G.** (2017) Durum wheat miRNAs  
765 in response to nitrogen starvation at the grain filling stage. *PLoS ONE* **12**(8), e0183253.
- 766

**Table 1.** Summary statistics and differential behavior for 12 morphological and one physiological trait in emmer and durum wheat under two N conditions: N starvation (-N) and optimal N (+N) condition. Data are reported as mean  $\pm$  SE

|                                     | G                                              |                                              |                   | N                                            |                                                |               | G x N                                        |                                                |                                              |                                              |               |
|-------------------------------------|------------------------------------------------|----------------------------------------------|-------------------|----------------------------------------------|------------------------------------------------|---------------|----------------------------------------------|------------------------------------------------|----------------------------------------------|----------------------------------------------|---------------|
|                                     | emmer                                          | durum wheat                                  | P value           | -N                                           | +N                                             | P value       | emmer x (-N)                                 | emmer x (+N)                                   | durum wheat x (-N)                           | durum wheat x (+N)                           | P value       |
| <b>TLN</b>                          | 3.88 $\pm$ 0.54                                | 4.81 $\pm$ 0.48                              | n.s.              | <b>3.50<math>\pm</math>0.19<sup>b</sup></b>  | <b>5.19<math>\pm</math>0.59<sup>a</sup></b>    | <b>0.0173</b> | 3.00 $\pm$ 0.00                              | 4.75 $\pm$ 0.92                                | 4.00 $\pm$ 0.00                              | 5.63 $\pm$ 0.80                              | n.s.          |
| <b>TLA (cm<sup>2</sup>)</b>         | <b>24.85<math>\pm</math>5.66<sup>b</sup></b>   | <b>41.92<math>\pm</math>8.39<sup>a</sup></b> | <b>0.0304</b>     | <b>19.98<math>\pm</math>1.43<sup>b</sup></b> | <b>46.79<math>\pm</math>8.35<sup>a</sup></b>   | <b>0.0023</b> | 17.22 $\pm$ 1.21                             | 32.48 $\pm$ 10.45                              | 22.74 $\pm$ 1.75                             | 61.10 $\pm$ 8.94                             | n.s.          |
| <b>SFW (g)</b>                      | <b>0.63<math>\pm</math>0.19<sup>b</sup></b>    | <b>1.17<math>\pm</math>0.30<sup>a</sup></b>  | <b>0.0453</b>     | <b>0.42 <math>\pm</math>0.05<sup>b</sup></b> | <b>1.39 <math>\pm</math>0.28<sup>a</sup></b>   | <b>0.0017</b> | 0.34 $\pm$ 0.04                              | 0.93 $\pm$ 0.32                                | 0.50 $\pm$ 0.07                              | 1.85 $\pm$ 0.35                              | n.s.          |
| <b>PRL (cm)</b>                     | 155.58 $\pm$ 26.79                             | 172.72 $\pm$ 25.42                           | n.s.              | 191.72 $\pm$ 21.60                           | 136.59 $\pm$ 26.47                             | n.s.          | 189.27 $\pm$ 31.72                           | 121.89 $\pm$ 39.82                             | 194.16 $\pm$ 34.17                           | 151.28 $\pm$ 39.25                           | n.s.          |
| <b>LRL (cm)</b>                     | 20.49 $\pm$ 7.00                               | 10.89 $\pm$ 4.04                             | n.s.              | 15.28 $\pm$ 5.19                             | 16.10 $\pm$ 6.70                               | n.s.          | 18.60 $\pm$ 8.34                             | 22.38 $\pm$ 12.53                              | 11.96 $\pm$ 6.99                             | 9.83 $\pm$ 5.13                              | n.s.          |
| <b>TRL (cm)</b>                     | 176.07 $\pm$ 32.17                             | 183.62 $\pm$ 27.96                           | n.s.              | 206.99 $\pm$ 24.99                           | 152.69 $\pm$ 31.39                             | n.s.          | 207.87 $\pm$ 39.64                           | 144.27 $\pm$ 50.83                             | 206.12 $\pm$ 36.65                           | 161.11 $\pm$ 44.36                           | n.s.          |
| <b>RSD (cm)</b>                     | 62.84 $\pm$ 5.38                               | 65.34 $\pm$ 3.66                             | n.s.              | 70.28 $\pm$ 2.54                             | 57.90 $\pm$ 5.04                               | n.s.          | 68.69 $\pm$ 4.09                             | 56.98 $\pm$ 9.76                               | 71.86 $\pm$ 3.41                             | 58.82 $\pm$ 4.74                             | n.s.          |
| <b>RSW (cm)</b>                     | 23.31 $\pm$ 3.26                               | 22.82 $\pm$ 3.22                             | n.s.              | 24.79 $\pm$ 3.08                             | 21.34 $\pm$ 3.27                               | n.s.          | 28.72 $\pm$ 3.47                             | 17.89 $\pm$ 4.25                               | 20.87 $\pm$ 4.68                             | 24.78 $\pm$ 4.89                             | n.s.          |
| <b>RDW (g)</b>                      | 0.02 $\pm$ 0.01                                | 0.03 $\pm$ 0.00                              | n.s.              | <b>0.03<math>\pm</math>0.00<sup>a</sup></b>  | <b>0.02<math>\pm</math>0.00<sup>b</sup></b>    | <b>0.0228</b> | 0.03 $\pm$ 0.01                              | 0.01 $\pm$ 0.00                                | 0.03 $\pm$ 0.01                              | 0.02 $\pm$ 0.00                              | n.s.          |
| <b>SRL (m g<sup>-1</sup>)</b>       | <b>107.31<math>\pm</math>15.77<sup>a</sup></b> | <b>67.69<math>\pm</math>5.99<sup>b</sup></b> | <b>0.0094</b>     | <b>70.31<math>\pm</math>5.93<sup>b</sup></b> | <b>104.69<math>\pm</math>16.65<sup>a</sup></b> | <b>0.0201</b> | <b>75.75<math>\pm</math>7.06<sup>b</sup></b> | <b>138.87<math>\pm</math>21.15<sup>a</sup></b> | <b>64.87<math>\pm</math>9.72<sup>b</sup></b> | <b>70.52<math>\pm</math>8.21<sup>b</sup></b> | <b>0.0449</b> |
| <b>TRL/TLA (cm cm<sup>-2</sup>)</b> | 7.92 $\pm$ 1.65                                | 5.98 $\pm$ 1.62                              | n.s.              | <b>10.57<math>\pm</math>1.28<sup>a</sup></b> | <b>3.34<math>\pm</math>0.45<sup>b</sup></b>    | <b>0.0002</b> | 11.68 $\pm$ 1.71                             | 4.17 $\pm$ 0.54                                | 9.46 $\pm$ 1.98                              | 2.50 $\pm$ 0.43                              | n.s.          |
| <b>LRL/PRL</b>                      | 0.11 $\pm$ 0.04                                | 0.06 $\pm$ 0.02                              | n.s.              | 0.07 $\pm$ 0.02                              | 0.10 $\pm$ 0.04                                | n.s.          | 0.09 $\pm$ 0.04                              | 0.14 $\pm$ 0.07                                | 0.06 $\pm$ 0.03                              | 0.05 $\pm$ 0.02                              | n.s.          |
| <b>SPAD</b>                         | <b>26.55<math>\pm</math>1.22<sup>b</sup></b>   | <b>34.91<math>\pm</math>2.24<sup>a</sup></b> | <b>&lt;0.0001</b> | <b>26.91<math>\pm</math>1.24<sup>b</sup></b> | <b>34.55<math>\pm</math>2.41<sup>a</sup></b>   | <b>0.0001</b> | <b>24.35<math>\pm</math>0.91<sup>b</sup></b> | <b>28.75<math>\pm</math>1.72<sup>b</sup></b>   | <b>29.48<math>\pm</math>1.40<sup>b</sup></b> | <b>40.35<math>\pm</math>1.31<sup>a</sup></b> | <b>0.0353</b> |

**TLN:** Total leaf number; **TLA:** Total leaf area (cm<sup>2</sup>) Calculated on all the leaf as leaf length. maximum width.0.858 (Kalra and Dhiman. 1976); **SFW:** Shoot fresh weight (g); **PRL:** Primary visible root length (cm); **LRL:** Lateral visible root length (cm); **TRL:** Total visible root length (cm); **RSD:** Visible root system depth (cm); **RSW:** Visible root system width (cm); **RDW:** Root dry weight (g); **TRL/TLA:** Total visible root length/total leaf area (cm cm<sup>-2</sup>); **SRL:** specific root length (defined as TRL/RDW); **SPAD:** Leaf chlorophyll content (SPAD units). Values annotated in bold are significantly different (Tukey's test) and the character 'a'/b' implies the higher/lower observed value for each significant change between the genotypes, the two N conditions and their interaction.

**Table 2.** Networks of emmer, durum wheat, intersection and common networks of transcripts and metabolites data.

|                                                                                 | <b>emmer</b> | <b>durum wheat</b> | <b>(durum wheat /emmer)</b> | <b>intersection</b> | <b>Common</b><br>(accepting the Fisher z test NULL hypothesis) |
|---------------------------------------------------------------------------------|--------------|--------------------|-----------------------------|---------------------|----------------------------------------------------------------|
| Number of edges in total                                                        | 1,249,637    | 3,500,971          | 2.8                         | 396,571             | 393,779                                                        |
| Number of edges DEG-DEG                                                         | 1,237,748    | 3,473,768          | 2.8                         | 394,015             | 393,719                                                        |
| Number of edges metabolite-metabolite                                           | 185          | 157                | 0.85                        | 65                  | 60                                                             |
| Number of edges DEG-metabolites                                                 | 11,704       | 27,046             | 2.3                         | 2,491               | 0                                                              |
| Number of nodes                                                                 | 1,829        | 3,167              | 1.7                         | 1,129               | 1,127                                                          |
| Number of central nodes                                                         | 260          | 479                | 1.8                         | 367                 | 398                                                            |
| Number of edges to the central nodes: DEGs – significantly behaved metabolites* | 1,898        | 4,590              | 2.4                         | 1,217               | 0                                                              |

\*significantly behaved metabolites considering the effect of G, N and GxN of the ANOVA model.

**Figure 1.** Differentially expressed genes between N starvation (-N) and optimal N (+N) conditions in durum wheat and emmer.

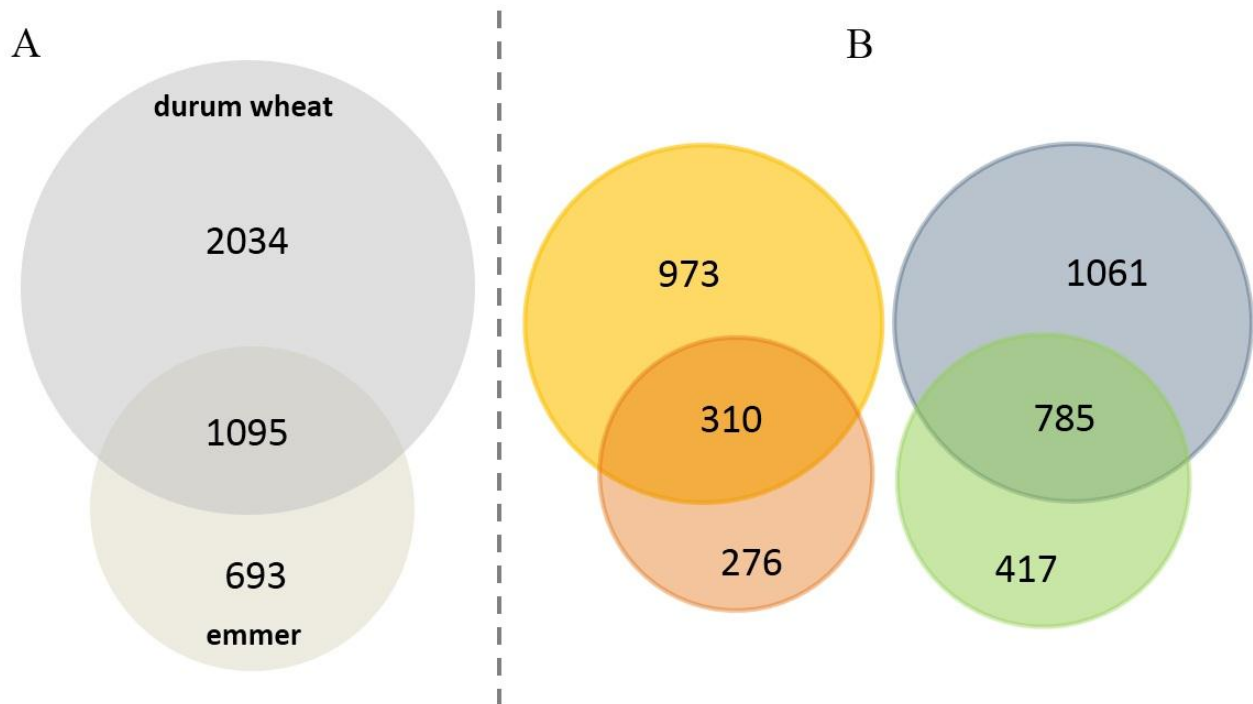

A: total DEGs between -N and +N for durum wheat and emmer; B: DEGs down regulated between -N and +N for durum wheat (●) and emmer (●); DEGs up regulated between -N and +N for durum wheat(●) and emmer (●)

**Figure 2.** Comparison of Gene Ontology classifications of DEGs in emmer and durum wheat. Blue and red color indicates the number of up- and down-regulated DEGs, respectively. All DEGs are categorized into 21 and 23 functional groups based on GO classification for emmer and durum wheat, respectively.

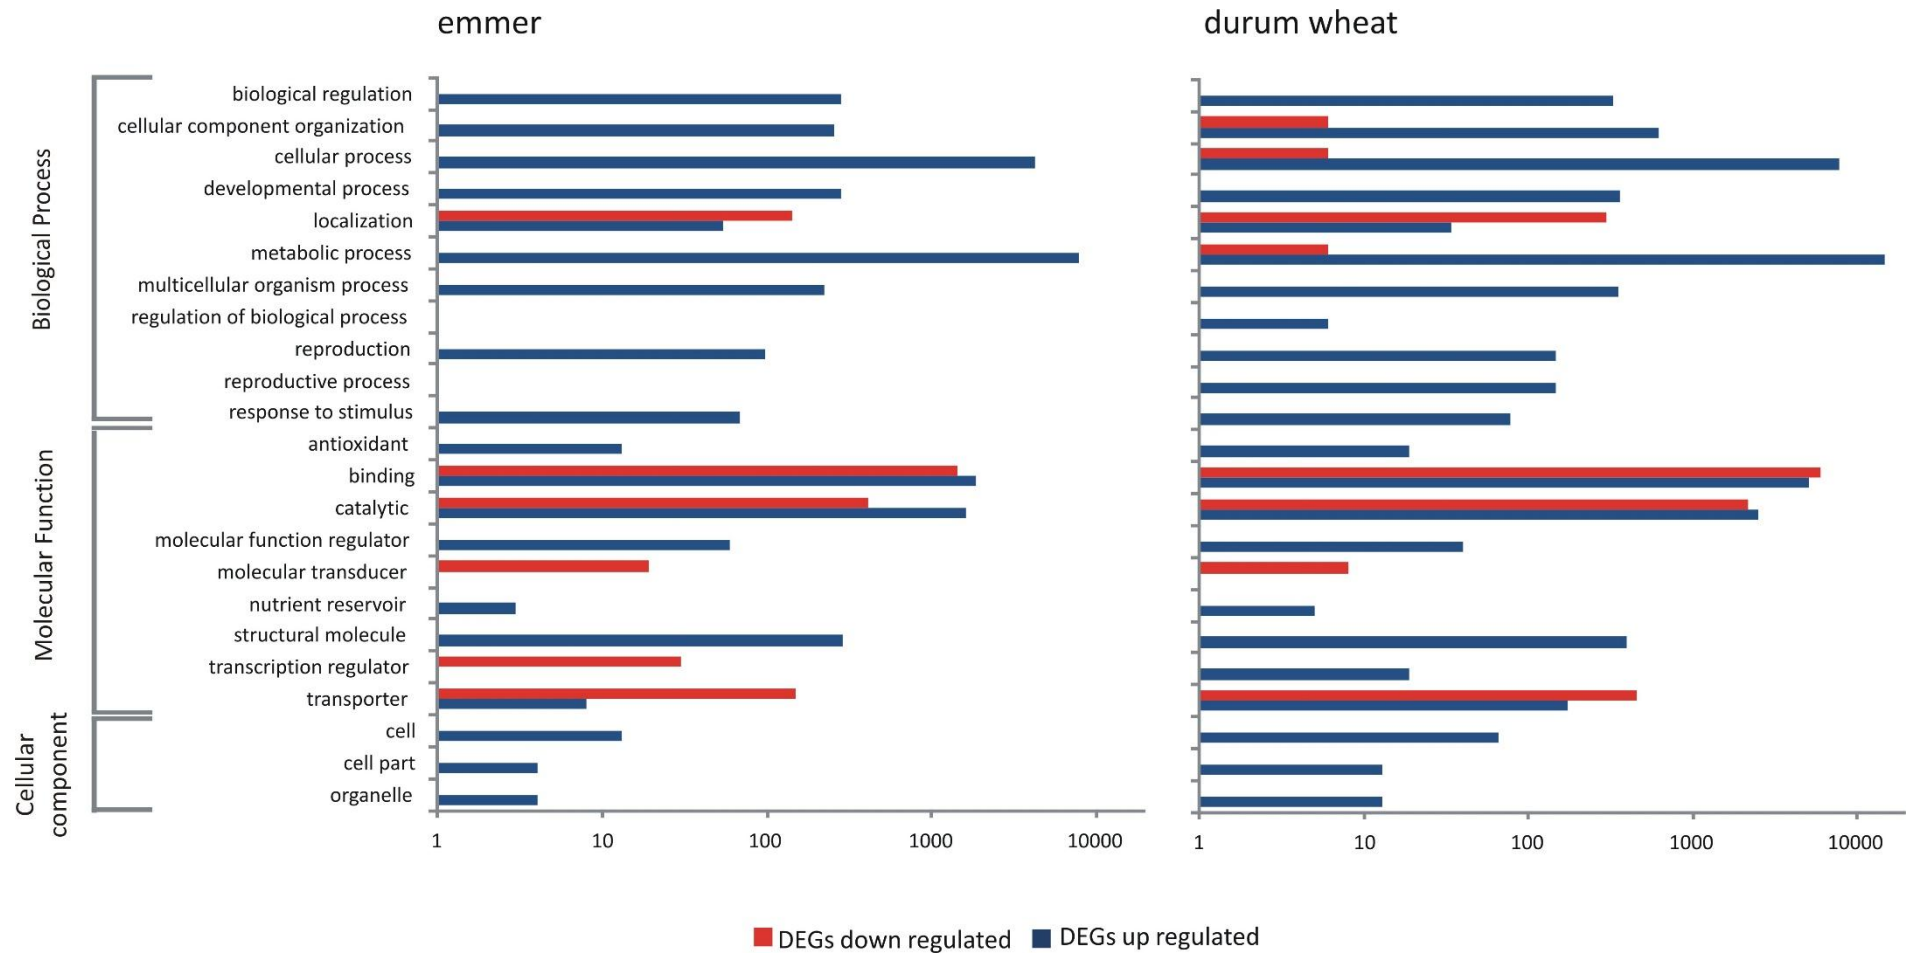



**Figure 3.** Metabolites exhibiting significant variation for emmer (red bars) and durum wheat (blue bars) under starvation (-N) and optimal (+N) levels due to the effect of GxN interaction. Bars with different letters are significantly different ( $p < 0.05$ )

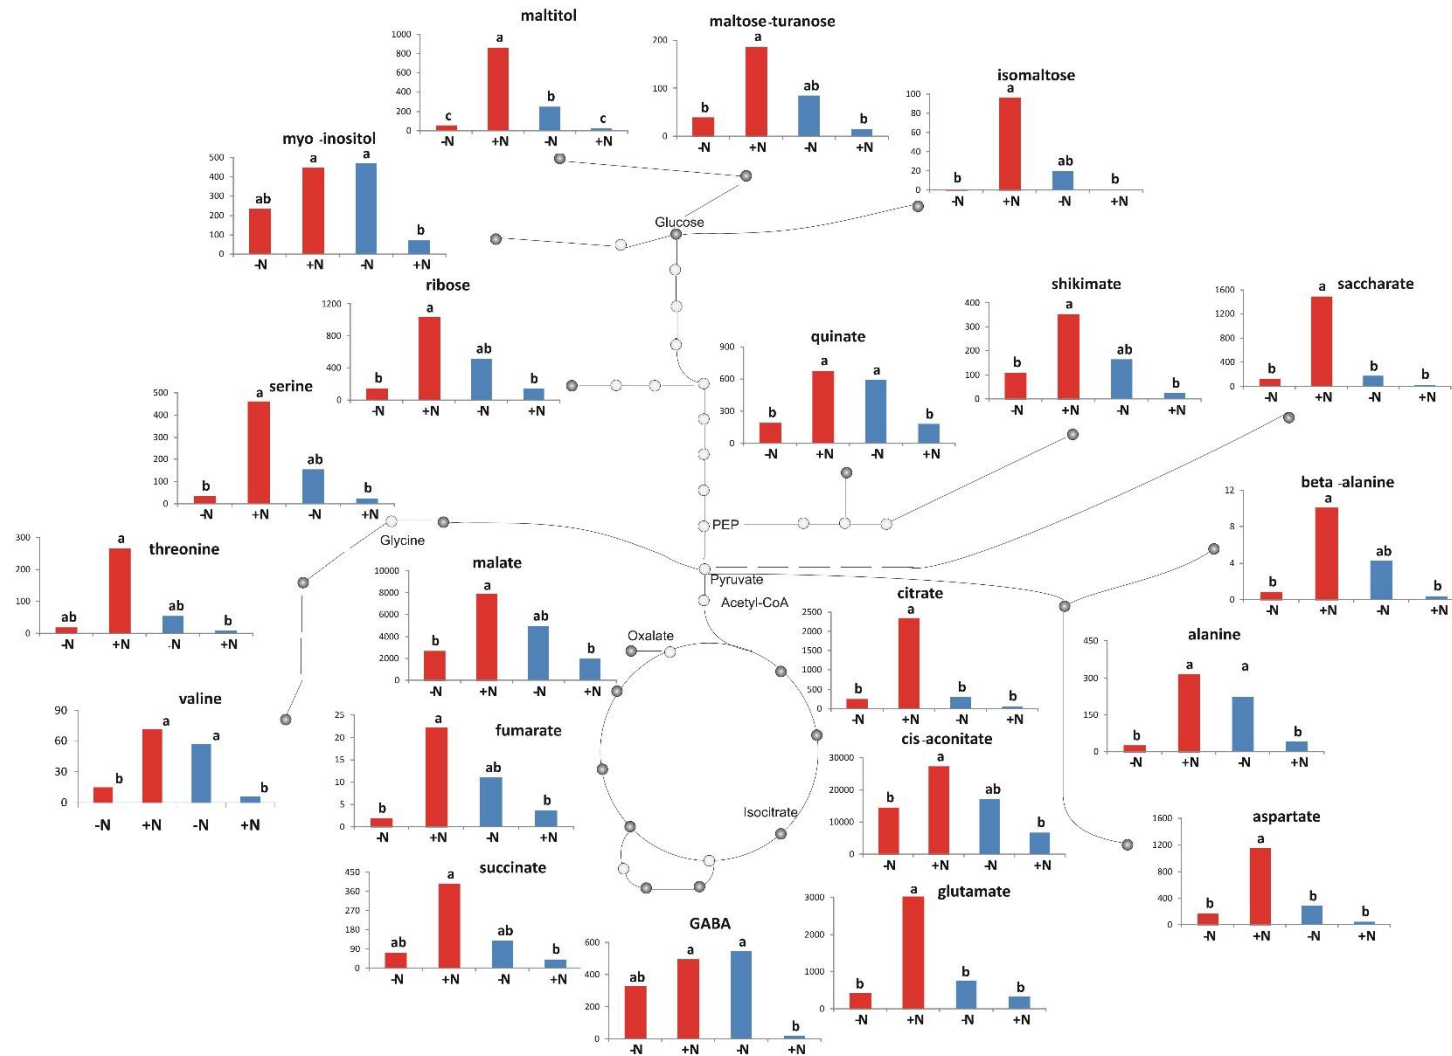

**Figure 4.** Genotype-specific DEGs-metabolites correlation networks, emmer (A) and durum wheat (B).

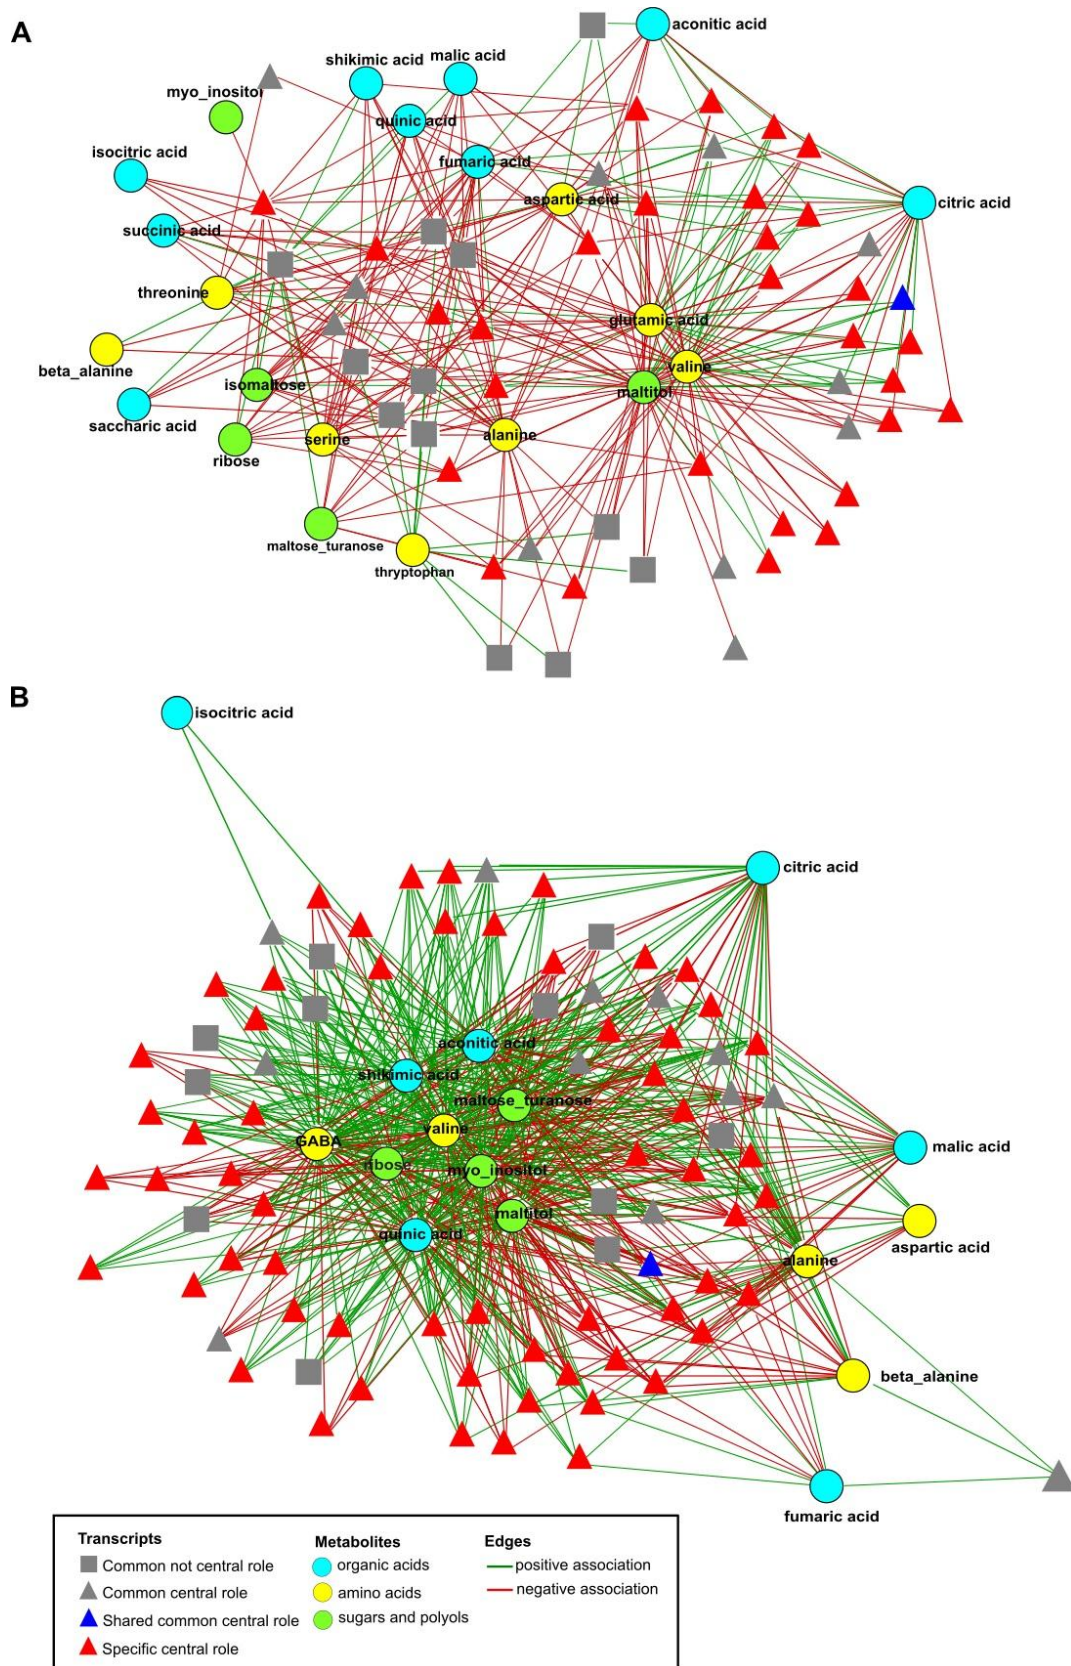

**Figure 5.** Position of the central DEGs in emmer- and durum wheat-specific networks on the physical map. DEGs having putative annotations were shown with filled triangles.

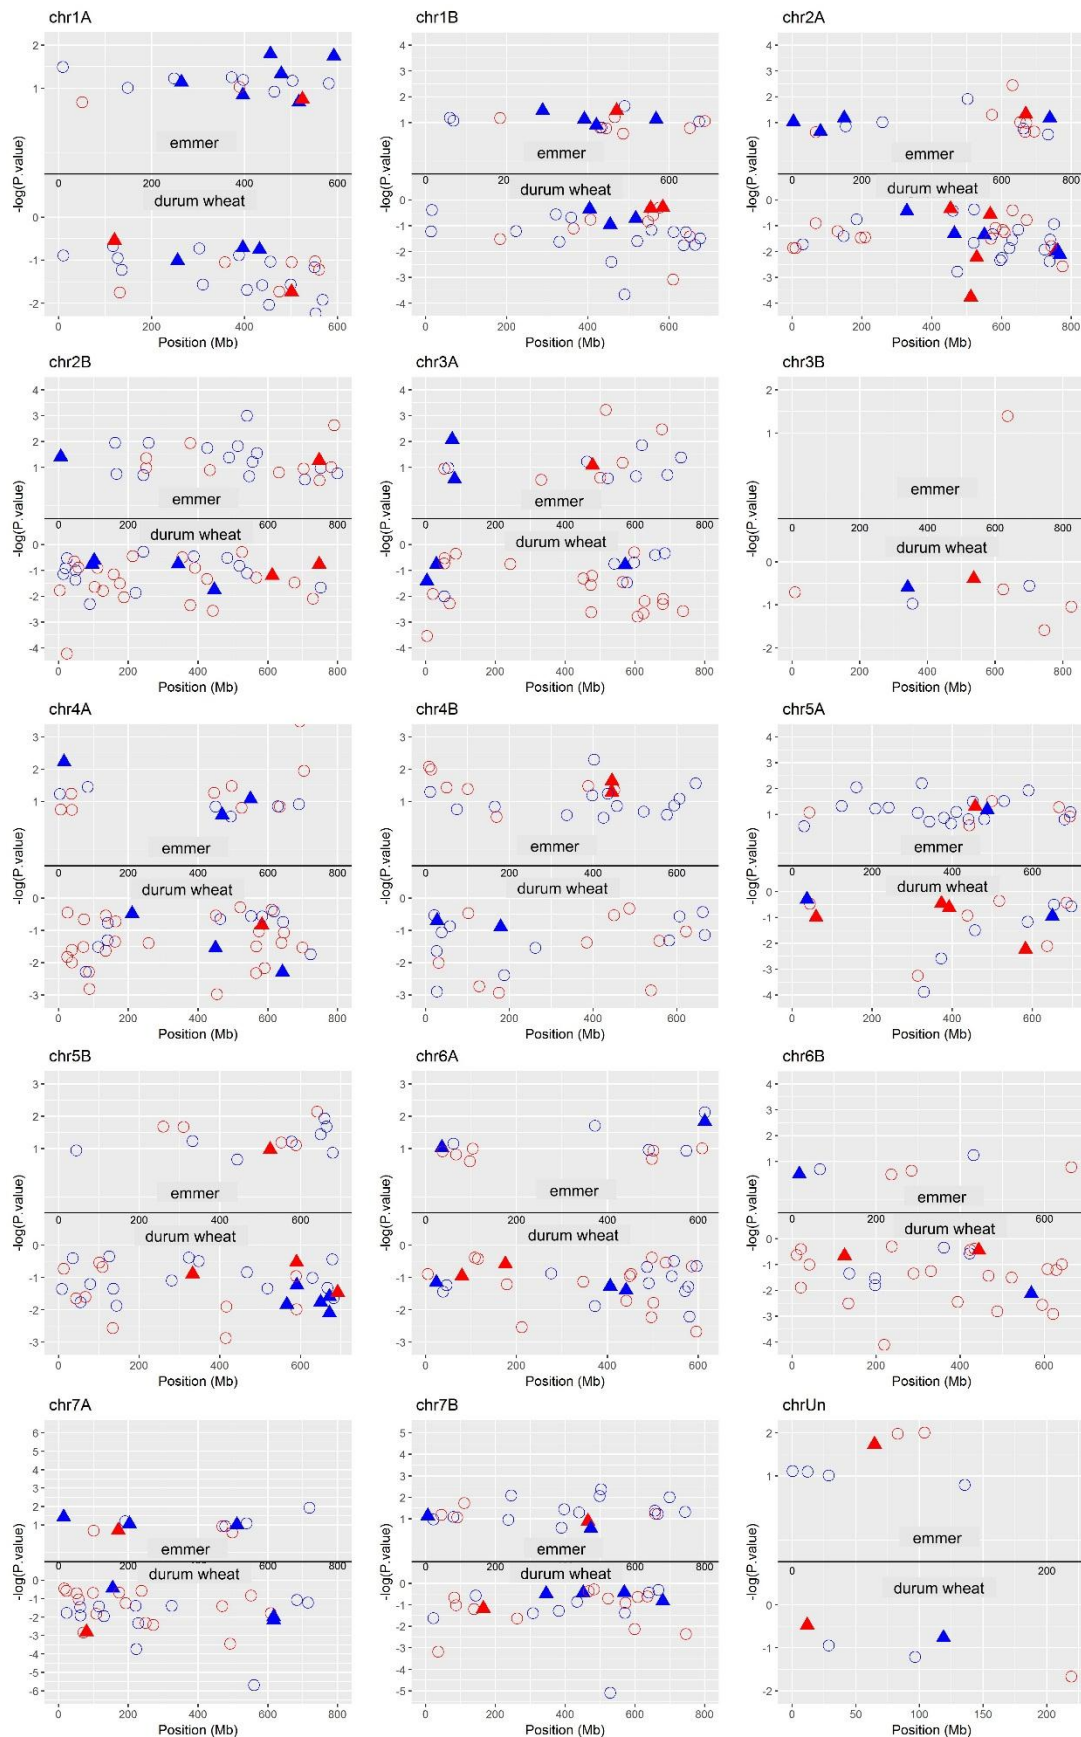

Source: https://www.biorxiv.org/content/10.1101/2020.02.03.931717v1.full.pdf
